# Supplementary material for: Meta-Analysis of Dilated Cardiomyopathy Using Cardiac RNA-Seq Transcriptomic Datasets
Source: PubMed Central journal article supplement (PMC7017089; doi:10.3390/genes11010060), 2020-01-04
Supplement: genes-11-00060-s001.pdf [file genes-11-00060-s001.pdf]

Supplementary Tables

**Supplementary Table S1. A complete list of differential expressed genes identified in meta-analysis of DCM vs NF.**

| Ensembl_ID      | gene_symbol          | DE_1 <sup>1</sup> | DE_2 <sup>1</sup> | DE_3 <sup>1</sup> | adj_p <sup>2</sup> | average_log <sub>2</sub> FC <sup>3</sup> | effect <sup>4</sup> |
|-----------------|----------------------|-------------------|-------------------|-------------------|--------------------|------------------------------------------|---------------------|
| ENSG00000076351 | <i>SLC46A1</i>       | Yes               | No                | No                | 0.00E+00           | 0.37                                     | Up                  |
| ENSG00000113389 | <i>NPR3</i>          | Yes               | Yes               | Yes               | 0.00E+00           | 2.14                                     | Up                  |
| ENSG00000126106 | <i>TMEM53</i>        | Yes               | No                | No                | 0.00E+00           | -0.60                                    | Down                |
| ENSG00000176293 | <i>ZNF135</i>        | Yes               | No                | No                | 0.00E+00           | 0.37                                     | Up                  |
| ENSG00000177575 | <i>CD163</i>         | No                | Yes               | No                | 0.00E+00           | -1.57                                    | Down                |
| ENSG00000189060 | <i>H1FO</i>          | Yes               | No                | No                | 0.00E+00           | -1.01                                    | Down                |
| ENSG00000227495 | <i>AC004771.1</i>    | Yes               | No                | No                | 0.00E+00           | -0.40                                    | Down                |
| ENSG00000263986 | <i>AC087393.2</i>    | Yes               | No                | No                | 0.00E+00           | 0.49                                     | Up                  |
| ENSG00000179526 | <i>SHARPIN</i>       | Yes               | No                | No                | 1.68E-13           | -0.54                                    | Down                |
| ENSG00000197616 | <i>MYH6</i>          | Yes               | No                | No                | 1.68E-13           | -1.85                                    | Down                |
| ENSG00000157388 | <i>CACNA1D</i>       | Yes               | No                | No                | 3.03E-13           | -1.10                                    | Down                |
| ENSG00000229867 | <i>STEAP3-AS1</i>    | Yes               | No                | No                | 5.87E-13           | -0.71                                    | Down                |
| ENSG00000167646 | <i>DNAAF3</i>        | Yes               | No                | No                | 1.28E-12           | 1.30                                     | Up                  |
| ENSG00000170448 | <i>NFXL1</i>         | Yes               | No                | Yes               | 7.58E-12           | -2.33                                    | Down                |
| ENSG00000186187 | <i>ZNRF1</i>         | Yes               | No                | No                | 2.44E-11           | -0.56                                    | Down                |
| ENSG00000259661 | <i>AC068831.4</i>    | Yes               | No                | No                | 2.57E-11           | -0.59                                    | Down                |
| ENSG00000142156 | <i>COL6A1</i>        | Yes               | No                | No                | 3.39E-11           | -0.78                                    | Down                |
| ENSG00000235910 | <i>APOA1-AS</i>      | Yes               | No                | No                | 4.28E-11           | 0.90                                     | Up                  |
| ENSG00000109099 | <i>PMP22</i>         | Yes               | No                | No                | 4.81E-11           | -0.86                                    | Down                |
| ENSG00000163220 | <i>S100A9</i>        | Yes               | Yes               | No                | 6.09E-11           | -2.13                                    | Down                |
| ENSG00000174437 | <i>ATP2A2</i>        | Yes               | No                | No                | 8.49E-11           | -0.83                                    | Down                |
| ENSG00000175221 | <i>MED16</i>         | Yes               | No                | No                | 1.06E-10           | -0.83                                    | Down                |
| ENSG00000198624 | <i>CCDC69</i>        | Yes               | No                | No                | 1.60E-10           | -1.04                                    | Down                |
| ENSG00000133800 | <i>LYVE1</i>         | Yes               | No                | Yes               | 1.72E-10           | -2.06                                    | Down                |
| ENSG00000267092 | <i>AC027307.1</i>    | Yes               | No                | No                | 1.85E-10           | 0.63                                     | Up                  |
| ENSG00000129250 | <i>KIF1C</i>         | Yes               | No                | No                | 2.27E-10           | -0.61                                    | Down                |
| ENSG00000256469 | <i>AP002383.2</i>    | Yes               | No                | No                | 2.84E-10           | 0.82                                     | Up                  |
| ENSG00000233098 | <i>CCDC144NL-AS1</i> | Yes               | No                | No                | 3.19E-10           | 0.37                                     | Up                  |
| ENSG00000105679 | <i>GAPDHS</i>        | Yes               | No                | No                | 3.53E-10           | 0.65                                     | Up                  |
| ENSG00000156463 | <i>SH3RF2</i>        | Yes               | No                | No                | 3.66E-10           | -1.05                                    | Down                |
| ENSG00000210127 | <i>MT-TA</i>         | Yes               | No                | No                | 3.66E-10           | -1.00                                    | Down                |
| ENSG00000183072 | <i>NKX2-5</i>        | Yes               | No                | No                | 9.88E-10           | -0.96                                    | Down                |
| ENSG00000125733 | <i>TRIP10</i>        | Yes               | No                | No                | 1.08E-09           | -0.88                                    | Down                |
| ENSG00000141905 | <i>NFIC</i>          | Yes               | No                | No                | 1.11E-09           | -0.61                                    | Down                |

|                 |                   |     |     |     |          |       |      |
|-----------------|-------------------|-----|-----|-----|----------|-------|------|
| ENSG00000135447 | <i>PPP1R1A</i>    | Yes | No  | Yes | 1.14E-09 | -1.00 | Down |
| ENSG00000107796 | <i>ACTA2</i>      | No  | Yes | Yes | 1.35E-09 | -1.38 | Down |
| ENSG00000140675 | <i>SLC5A2</i>     | Yes | No  | No  | 1.75E-09 | 0.41  | Up   |
| ENSG00000101187 | <i>SLCO4A1</i>    | No  | Yes | Yes | 2.57E-09 | -1.91 | Down |
| ENSG00000103710 | <i>RASL12</i>     | Yes | No  | Yes | 3.61E-09 | -1.34 | Down |
| ENSG00000155659 | <i>VSIG4</i>      | Yes | Yes | No  | 3.85E-09 | -2.04 | Down |
| ENSG00000253549 | <i>CA3-AS1</i>    | Yes | No  | Yes | 4.04E-09 | 2.41  | Up   |
| ENSG00000105698 | <i>USF2</i>       | Yes | No  | No  | 5.02E-09 | -0.50 | Down |
| ENSG00000196642 | <i>RABL6</i>      | Yes | No  | No  | 5.44E-09 | -0.52 | Down |
| ENSG00000122034 | <i>GTF3A</i>      | Yes | No  | No  | 8.93E-09 | -0.62 | Down |
| ENSG00000235790 | <i>AC114488.2</i> | Yes | No  | No  | 9.04E-09 | 0.83  | Up   |
| ENSG00000104879 | <i>CKM</i>        | Yes | No  | No  | 1.05E-08 | -0.95 | Down |
| ENSG00000114867 | <i>EIF4G1</i>     | Yes | No  | No  | 1.21E-08 | -0.80 | Down |
| ENSG00000260469 | <i>INSYN1-AS1</i> | Yes | No  | No  | 1.33E-08 | -0.96 | Down |
| ENSG00000260755 | <i>AC010542.2</i> | Yes | No  | No  | 1.49E-08 | 0.38  | Up   |
| ENSG00000257453 | <i>AC011611.3</i> | Yes | Yes | No  | 1.60E-08 | 1.39  | Up   |
| ENSG00000104894 | <i>CD37</i>       | Yes | No  | No  | 1.83E-08 | -0.36 | Down |
| ENSG00000272345 | <i>AL031775.1</i> | Yes | No  | No  | 2.25E-08 | -0.48 | Down |
| ENSG00000253645 | <i>AC108863.1</i> | Yes | No  | No  | 2.61E-08 | 0.41  | Up   |
| ENSG00000156471 | <i>PTDSS1</i>     | Yes | No  | No  | 3.01E-08 | -1.25 | Down |
| ENSG00000178297 | <i>TMPRSS9</i>    | Yes | No  | No  | 3.37E-08 | 0.48  | Up   |
| ENSG00000274021 | <i>AC024909.1</i> | Yes | No  | No  | 3.37E-08 | 0.98  | Up   |
| ENSG00000187837 | <i>HIST1H1C</i>   | Yes | No  | No  | 3.55E-08 | -0.80 | Down |
| ENSG00000205363 | <i>INSYN1</i>     | Yes | No  | Yes | 3.96E-08 | -1.30 | Down |
| ENSG00000137331 | <i>IER3</i>       | Yes | No  | No  | 4.20E-08 | -0.67 | Down |
| ENSG00000188229 | <i>TUBB4B</i>     | Yes | No  | No  | 4.20E-08 | -1.20 | Down |
| ENSG00000125730 | <i>C3</i>         | Yes | No  | No  | 4.63E-08 | -1.39 | Down |
| ENSG00000175084 | <i>DES</i>        | Yes | No  | No  | 4.91E-08 | -0.73 | Down |
| ENSG00000224985 | <i>AL590714.1</i> | Yes | No  | No  | 5.34E-08 | -0.33 | Down |
| ENSG00000139289 | <i>PHLDA1</i>     | Yes | Yes | No  | 5.50E-08 | 1.28  | Up   |
| ENSG00000137818 | <i>RPLP1</i>      | Yes | No  | No  | 5.71E-08 | -0.78 | Down |
| ENSG00000105058 | <i>FAM32A</i>     | Yes | No  | No  | 6.51E-08 | -0.85 | Down |
| ENSG00000272288 | <i>AL451165.2</i> | Yes | No  | No  | 6.58E-08 | -0.39 | Down |
| ENSG00000189058 | <i>APOD</i>       | Yes | No  | Yes | 7.26E-08 | -1.28 | Down |
| ENSG00000163050 | <i>COQ8A</i>      | Yes | No  | No  | 7.30E-08 | -0.87 | Down |
| ENSG00000101335 | <i>MYL9</i>       | Yes | No  | No  | 7.31E-08 | -0.88 | Down |
| ENSG00000196924 | <i>FLNA</i>       | Yes | No  | No  | 7.31E-08 | -0.83 | Down |
| ENSG00000149294 | <i>NCAM1</i>      | Yes | No  | No  | 7.54E-08 | -0.61 | Down |
| ENSG00000125844 | <i>RRBP1</i>      | Yes | No  | No  | 7.81E-08 | -0.48 | Down |
| ENSG00000182175 | <i>RGMA</i>       | Yes | No  | No  | 8.37E-08 | -1.14 | Down |

|                 |                   |     |     |     |          |       |      |
|-----------------|-------------------|-----|-----|-----|----------|-------|------|
| ENSG00000259683 | <i>AC243562.2</i> | Yes | No  | No  | 8.68E-08 | 0.89  | Up   |
| ENSG00000019169 | <i>MARCO</i>      | Yes | Yes | No  | 8.80E-08 | -2.93 | Down |
| ENSG00000034510 | <i>TMSB10</i>     | Yes | No  | No  | 8.80E-08 | -1.02 | Down |
| ENSG00000152580 | <i>IGSF10</i>     | Yes | No  | No  | 9.06E-08 | 1.21  | Up   |
| ENSG00000166091 | <i>CMTM5</i>      | Yes | Yes | No  | 9.23E-08 | -1.52 | Down |
| ENSG00000187922 | <i>LCN10</i>      | Yes | Yes | Yes | 9.40E-08 | -2.64 | Down |
| ENSG00000123240 | <i>OPTN</i>       | Yes | No  | No  | 1.35E-07 | -0.73 | Down |
| ENSG00000197548 | <i>ATG7</i>       | Yes | No  | No  | 1.58E-07 | 0.26  | Up   |
| ENSG00000259488 | <i>AC023355.1</i> | Yes | No  | No  | 1.70E-07 | 0.42  | Up   |
| ENSG00000103023 | <i>PRSS54</i>     | Yes | No  | No  | 1.79E-07 | 1.12  | Up   |
| ENSG00000173402 | <i>DAG1</i>       | Yes | No  | No  | 1.94E-07 | -0.70 | Down |
| ENSG00000085662 | <i>AKR1B1</i>     | Yes | No  | Yes | 1.99E-07 | -1.36 | Down |
| ENSG00000140534 | <i>TICRR</i>      | Yes | No  | No  | 2.18E-07 | 0.69  | Up   |
| ENSG00000165916 | <i>PSMC3</i>      | Yes | No  | No  | 2.22E-07 | -0.74 | Down |
| ENSG00000267577 | <i>AC010327.3</i> | Yes | No  | No  | 2.24E-07 | 1.18  | Up   |
| ENSG00000120729 | <i>MYOT</i>       | Yes | Yes | No  | 2.25E-07 | -1.08 | Down |
| ENSG00000224195 | <i>AC022400.1</i> | Yes | No  | No  | 2.33E-07 | 0.50  | Up   |
| ENSG00000254254 | <i>AC012349.1</i> | Yes | No  | No  | 2.46E-07 | 2.00  | Up   |
| ENSG00000129538 | <i>RNASE1</i>     | Yes | No  | No  | 2.68E-07 | -1.15 | Down |
| ENSG00000113369 | <i>ARRDC3</i>     | Yes | No  | No  | 2.94E-07 | 0.97  | Up   |
| ENSG00000138193 | <i>PLCE1</i>      | Yes | No  | Yes | 3.27E-07 | 1.13  | Up   |
| ENSG00000141736 | <i>ERBB2</i>      | Yes | No  | No  | 3.27E-07 | -0.58 | Down |
| ENSG00000140416 | <i>TPM1</i>       | Yes | No  | No  | 3.28E-07 | -0.74 | Down |
| ENSG00000255252 | <i>AL078612.1</i> | Yes | No  | No  | 3.80E-07 | -0.44 | Down |
| ENSG00000184164 | <i>CRELD2</i>     | Yes | No  | No  | 4.70E-07 | -0.61 | Down |
| ENSG00000166206 | <i>GABRB3</i>     | Yes | No  | Yes | 4.80E-07 | -1.70 | Down |
| ENSG00000198763 | <i>MT-ND2</i>     | Yes | No  | No  | 5.34E-07 | -0.61 | Down |
| ENSG00000257653 | <i>AC117498.1</i> | Yes | No  | No  | 6.01E-07 | 0.49  | Up   |
| ENSG00000277258 | <i>PCGF2</i>      | Yes | No  | No  | 6.62E-07 | -0.40 | Down |
| ENSG00000167996 | <i>FTH1</i>       | Yes | No  | No  | 7.00E-07 | -0.72 | Down |
| ENSG00000147872 | <i>PLIN2</i>      | Yes | Yes | No  | 8.32E-07 | -1.43 | Down |
| ENSG00000161970 | <i>RPL26</i>      | Yes | No  | No  | 8.36E-07 | -0.77 | Down |
| ENSG00000149716 | <i>LTO1</i>       | Yes | No  | No  | 8.77E-07 | 0.43  | Up   |
| ENSG00000152086 | <i>TUBA3E</i>     | Yes | No  | Yes | 8.78E-07 | -2.46 | Down |
| ENSG00000173369 | <i>C1QB</i>       | Yes | Yes | No  | 8.78E-07 | -1.42 | Down |
| ENSG00000286018 | <i>AF129075.3</i> | Yes | No  | No  | 9.51E-07 | -0.28 | Down |
| ENSG00000196739 | <i>COL27A1</i>    | Yes | No  | No  | 1.14E-06 | -1.02 | Down |
| ENSG00000125691 | <i>RPL23</i>      | Yes | No  | No  | 1.28E-06 | -0.63 | Down |
| ENSG00000184489 | <i>PTP4A3</i>     | Yes | No  | Yes | 1.69E-06 | -0.94 | Down |
| ENSG00000159387 | <i>IRX6</i>       | Yes | No  | No  | 1.71E-06 | 1.97  | Up   |

|                 |                      |     |     |     |          |       |      |
|-----------------|----------------------|-----|-----|-----|----------|-------|------|
| ENSG00000203804 | <i>ADAMTSL4-AS1</i>  | No  | No  | Yes | 1.74E-06 | -0.99 | Down |
| ENSG00000164855 | <i>TMEM184A</i>      | Yes | No  | No  | 1.92E-06 | 0.77  | Up   |
| ENSG00000196498 | <i>NCOR2</i>         | Yes | No  | No  | 1.92E-06 | -0.43 | Down |
| ENSG00000198336 | <i>MYL4</i>          | Yes | No  | Yes | 1.93E-06 | -2.60 | Down |
| ENSG00000198157 | <i>HMGN5</i>         | Yes | No  | No  | 2.25E-06 | -0.92 | Down |
| ENSG00000257950 | <i>P2RX5-TAX1BP3</i> | Yes | No  | No  | 2.25E-06 | -0.43 | Down |
| ENSG00000204519 | <i>ZNF551</i>        | Yes | No  | No  | 2.34E-06 | 0.56  | Up   |
| ENSG00000172086 | <i>KRCC1</i>         | Yes | No  | No  | 2.38E-06 | -0.66 | Down |
| ENSG00000118181 | <i>RPS25</i>         | Yes | No  | No  | 2.68E-06 | -0.50 | Down |
| ENSG00000114923 | <i>SLC4A3</i>        | Yes | No  | No  | 3.35E-06 | -0.53 | Down |
| ENSG00000136436 | <i>CALCOCO2</i>      | Yes | No  | No  | 3.40E-06 | -0.82 | Down |
| ENSG00000179218 | <i>CALR</i>          | Yes | No  | No  | 3.40E-06 | -0.59 | Down |
| ENSG00000105185 | <i>PDCD5</i>         | Yes | No  | No  | 3.50E-06 | -0.99 | Down |
| ENSG00000124491 | <i>F13A1</i>         | Yes | No  | No  | 3.50E-06 | -1.69 | Down |
| ENSG00000075886 | <i>TUBA3D</i>        | Yes | Yes | Yes | 3.66E-06 | -1.75 | Down |
| ENSG00000168610 | <i>STAT3</i>         | Yes | No  | No  | 3.81E-06 | -1.05 | Down |
| ENSG00000160808 | <i>MYL3</i>          | Yes | No  | No  | 3.84E-06 | -1.08 | Down |
| ENSG00000117592 | <i>PRDX6</i>         | Yes | No  | No  | 3.89E-06 | -0.89 | Down |
| ENSG00000132522 | <i>GPS2</i>          | Yes | No  | No  | 4.36E-06 | -0.34 | Down |
| ENSG00000065054 | <i>SLC9A3R2</i>      | Yes | No  | No  | 4.40E-06 | -1.04 | Down |
| ENSG00000118194 | <i>TNNT2</i>         | Yes | No  | No  | 4.40E-06 | -0.62 | Down |
| ENSG00000228620 | <i>Z97056.1</i>      | Yes | No  | No  | 4.60E-06 | 0.89  | Up   |
| ENSG00000065978 | <i>YBX1</i>          | Yes | No  | No  | 5.02E-06 | -0.55 | Down |
| ENSG00000160051 | <i>IQCC</i>          | Yes | No  | No  | 5.09E-06 | 0.56  | Up   |
| ENSG00000263388 | <i>AC002347.2</i>    | Yes | No  | No  | 5.26E-06 | 0.51  | Up   |
| ENSG00000263843 | <i>AC022211.2</i>    | Yes | No  | No  | 5.48E-06 | -0.42 | Down |
| ENSG00000173113 | <i>TRMT112</i>       | Yes | No  | No  | 5.64E-06 | -0.31 | Down |
| ENSG00000233110 | <i>AC093797.1</i>    | Yes | No  | No  | 6.01E-06 | 0.97  | Up   |
| ENSG00000089157 | <i>RPLP0</i>         | Yes | No  | No  | 6.43E-06 | -1.08 | Down |
| ENSG00000204574 | <i>ABCF1</i>         | Yes | No  | No  | 6.69E-06 | -0.47 | Down |
| ENSG00000068976 | <i>PYGM</i>          | Yes | No  | Yes | 7.34E-06 | -1.21 | Down |
| ENSG00000130176 | <i>CNN1</i>          | Yes | Yes | No  | 7.74E-06 | -1.62 | Down |
| ENSG00000175416 | <i>CLTB</i>          | Yes | No  | No  | 8.28E-06 | -0.70 | Down |
| ENSG00000198888 | <i>MT-ND1</i>        | Yes | No  | No  | 8.74E-06 | -0.64 | Down |
| ENSG00000183255 | <i>PTTG1IP</i>       | Yes | No  | No  | 9.07E-06 | -0.50 | Down |
| ENSG00000211445 | <i>GPX3</i>          | Yes | No  | No  | 9.18E-06 | -0.83 | Down |
| ENSG00000053524 | <i>MCF2L2</i>        | Yes | No  | No  | 9.66E-06 | 1.09  | Up   |
| ENSG00000262884 | <i>AC015921.1</i>    | Yes | No  | No  | 9.88E-06 | -0.88 | Down |
| ENSG00000260465 | <i>AC018557.1</i>    | Yes | No  | No  | 9.89E-06 | 0.26  | Up   |

|                 |                   |     |     |     |          |       |      |
|-----------------|-------------------|-----|-----|-----|----------|-------|------|
| ENSG00000161016 | <i>RPL8</i>       | Yes | No  | No  | 9.92E-06 | -0.71 | Down |
| ENSG00000007080 | <i>CCDC124</i>    | Yes | No  | No  | 1.10E-05 | -0.63 | Down |
| ENSG00000171533 | <i>MAP6</i>       | Yes | No  | No  | 1.18E-05 | 0.43  | Up   |
| ENSG00000286037 | <i>AC011479.4</i> | Yes | No  | No  | 1.18E-05 | 0.62  | Up   |
| ENSG00000272153 | <i>AL365330.1</i> | Yes | No  | No  | 1.22E-05 | 0.30  | Up   |
| ENSG00000214530 | <i>STARD10</i>    | Yes | No  | Yes | 1.23E-05 | -1.02 | Down |
| ENSG00000198855 | <i>FICD</i>       | Yes | No  | No  | 1.25E-05 | 0.50  | Up   |
| ENSG00000164694 | <i>FNDC1</i>      | Yes | Yes | No  | 1.49E-05 | 2.23  | Up   |
| ENSG00000213024 | <i>NUP62</i>      | Yes | No  | No  | 1.50E-05 | -0.58 | Down |
| ENSG00000258761 | <i>AC116903.1</i> | Yes | No  | No  | 1.60E-05 | -0.46 | Down |
| ENSG00000063245 | <i>EPN1</i>       | Yes | No  | No  | 1.66E-05 | -0.75 | Down |
| ENSG00000071626 | <i>DAZAP1</i>     | Yes | No  | No  | 1.80E-05 | -0.80 | Down |
| ENSG00000137312 | <i>FLOT1</i>      | Yes | No  | No  | 1.82E-05 | -0.68 | Down |
| ENSG00000187498 | <i>COL4A1</i>     | Yes | No  | No  | 1.84E-05 | -0.75 | Down |
| ENSG00000176046 | <i>NUPR1</i>      | Yes | No  | No  | 1.90E-05 | -0.79 | Down |
| ENSG00000075624 | <i>ACTB</i>       | Yes | No  | No  | 1.95E-05 | -0.98 | Down |
| ENSG00000196557 | <i>CACNA1H</i>    | No  | Yes | No  | 2.00E-05 | -1.02 | Down |
| ENSG00000196821 | <i>C6orf106</i>   | Yes | No  | No  | 2.00E-05 | -0.59 | Down |
| ENSG00000105953 | <i>OGDH</i>       | Yes | No  | No  | 2.05E-05 | -0.68 | Down |
| ENSG00000198959 | <i>TGM2</i>       | Yes | No  | No  | 2.10E-05 | -0.96 | Down |
| ENSG00000241135 | <i>LINC00881</i>  | Yes | No  | No  | 2.12E-05 | -1.04 | Down |
| ENSG00000089009 | <i>RPL6</i>       | Yes | No  | No  | 2.14E-05 | -0.77 | Down |
| ENSG00000188643 | <i>S100A16</i>    | Yes | No  | No  | 2.19E-05 | -1.32 | Down |
| ENSG00000126247 | <i>CAPNS1</i>     | Yes | No  | No  | 2.24E-05 | -0.69 | Down |
| ENSG00000269886 | <i>AC022382.1</i> | Yes | No  | No  | 2.26E-05 | 0.81  | Up   |
| ENSG00000160392 | <i>C19orf47</i>   | Yes | No  | No  | 2.42E-05 | -0.93 | Down |
| ENSG00000225400 | <i>RAB28P5</i>    | Yes | No  | No  | 2.50E-05 | 0.48  | Up   |
| ENSG00000198467 | <i>TPM2</i>       | Yes | No  | No  | 2.63E-05 | -0.80 | Down |
| ENSG00000232767 | <i>AC016825.1</i> | Yes | No  | No  | 2.64E-05 | -0.40 | Down |
| ENSG00000100401 | <i>RANGAP1</i>    | Yes | No  | No  | 2.64E-05 | -0.62 | Down |
| ENSG00000136918 | <i>WDR38</i>      | Yes | No  | No  | 2.79E-05 | 0.37  | Up   |
| ENSG00000240583 | <i>AQP1</i>       | Yes | Yes | No  | 2.82E-05 | -1.15 | Down |
| ENSG00000071127 | <i>WDR1</i>       | Yes | No  | No  | 3.01E-05 | -0.90 | Down |
| ENSG00000173457 | <i>PPP1R14B</i>   | Yes | No  | No  | 3.01E-05 | -0.86 | Down |
| ENSG00000167671 | <i>UBXN6</i>      | Yes | No  | No  | 3.14E-05 | -0.37 | Down |
| ENSG00000179943 | <i>FIZ1</i>       | Yes | No  | No  | 3.15E-05 | -0.37 | Down |
| ENSG00000199053 | <i>MIR324</i>     | Yes | No  | No  | 3.58E-05 | 0.67  | Up   |
| ENSG00000105974 | <i>CAV1</i>       | Yes | No  | No  | 3.70E-05 | -0.72 | Down |
| ENSG00000049768 | <i>FOXP3</i>      | Yes | No  | No  | 3.70E-05 | 0.49  | Up   |
| ENSG00000101421 | <i>CHMP4B</i>     | Yes | No  | No  | 3.75E-05 | -0.55 | Down |

|                 |                    |     |     |     |          |       |      |
|-----------------|--------------------|-----|-----|-----|----------|-------|------|
| ENSG00000169221 | <i>TBC1D10B</i>    | Yes | No  | No  | 4.23E-05 | -0.37 | Down |
| ENSG00000073008 | <i>PVR</i>         | Yes | No  | No  | 4.27E-05 | -1.04 | Down |
| ENSG00000125651 | <i>GTF2F1</i>      | Yes | No  | No  | 4.51E-05 | -0.49 | Down |
| ENSG00000170142 | <i>UBE2E1</i>      | Yes | No  | No  | 4.54E-05 | -0.30 | Down |
| ENSG00000182054 | <i>IDH2</i>        | Yes | No  | No  | 5.07E-05 | -0.86 | Down |
| ENSG00000120049 | <i>KCNIP2</i>      | Yes | No  | No  | 5.08E-05 | -0.99 | Down |
| ENSG00000131459 | <i>GFPT2</i>       | Yes | No  | Yes | 5.09E-05 | -1.80 | Down |
| ENSG00000229273 | <i>BX664615.1</i>  | Yes | No  | No  | 5.50E-05 | 0.49  | Up   |
| ENSG00000269139 | <i>AC010336.5</i>  | Yes | No  | No  | 5.50E-05 | -0.67 | Down |
| ENSG00000232803 | <i>SLCO4A1-AS1</i> | No  | Yes | Yes | 5.72E-05 | -1.54 | Down |
| ENSG00000188163 | <i>FAM166A</i>     | Yes | No  | No  | 5.87E-05 | -0.96 | Down |
| ENSG00000012211 | <i>PRICKLE3</i>    | Yes | No  | No  | 6.21E-05 | -0.62 | Down |
| ENSG00000175166 | <i>PSMD2</i>       | Yes | No  | No  | 6.73E-05 | -0.42 | Down |
| ENSG00000114854 | <i>TNNC1</i>       | Yes | No  | No  | 7.34E-05 | -0.57 | Down |
| ENSG00000177731 | <i>FLII</i>        | Yes | No  | No  | 7.39E-05 | -0.57 | Down |
| ENSG00000130816 | <i>DNMT1</i>       | Yes | No  | No  | 7.56E-05 | -0.87 | Down |
| ENSG00000187984 | <i>ANKRD19P</i>    | Yes | No  | No  | 7.64E-05 | 0.44  | Up   |
| ENSG00000258232 | <i>AC125611.3</i>  | Yes | No  | No  | 7.73E-05 | -0.80 | Down |
| ENSG00000081803 | <i>CADPS2</i>      | No  | No  | Yes | 7.82E-05 | -1.39 | Down |
| ENSG00000116350 | <i>SRSF4</i>       | Yes | No  | No  | 8.51E-05 | -0.25 | Down |
| ENSG00000185475 | <i>TMEM179B</i>    | Yes | No  | No  | 8.71E-05 | -0.45 | Down |
| ENSG00000196549 | <i>MME</i>         | No  | Yes | Yes | 8.75E-05 | 1.96  | Up   |
| ENSG00000039319 | <i>ZFYVE16</i>     | Yes | No  | No  | 8.81E-05 | 0.68  | Up   |
| ENSG00000170417 | <i>TMEM182</i>     | Yes | No  | No  | 8.95E-05 | 1.29  | Up   |
| ENSG00000279033 | <i>AC090984.1</i>  | Yes | No  | No  | 8.99E-05 | 0.31  | Up   |
| ENSG00000083845 | <i>RPS5</i>        | Yes | No  | No  | 9.42E-05 | -0.70 | Down |
| ENSG00000101439 | <i>CST3</i>        | Yes | No  | No  | 9.42E-05 | -0.63 | Down |
| ENSG00000198874 | <i>TYW1</i>        | Yes | No  | No  | 9.42E-05 | 0.28  | Up   |
| ENSG00000213694 | <i>S1PR3</i>       | Yes | No  | Yes | 9.42E-05 | -1.26 | Down |
| ENSG00000188227 | <i>ZNF793</i>      | Yes | No  | No  | 9.86E-05 | 0.58  | Up   |
| ENSG00000163468 | <i>CCT3</i>        | Yes | No  | No  | 1.02E-04 | -0.85 | Down |
| ENSG00000213442 | <i>RPL18AP3</i>    | Yes | No  | No  | 1.06E-04 | -0.85 | Down |
| ENSG00000163431 | <i>LMOD1</i>       | No  | No  | Yes | 1.07E-04 | -1.02 | Down |
| ENSG00000066230 | <i>SLC9A3</i>      | Yes | Yes | No  | 1.08E-04 | 1.27  | Up   |
| ENSG00000136875 | <i>PRPF4</i>       | Yes | No  | No  | 1.08E-04 | -0.35 | Down |
| ENSG00000279314 | <i>AC002525.1</i>  | Yes | No  | No  | 1.08E-04 | 0.64  | Up   |
| ENSG00000104848 | <i>KCNA7</i>       | Yes | No  | Yes | 1.13E-04 | -1.66 | Down |
| ENSG00000235958 | <i>UBOX5-AS1</i>   | Yes | No  | No  | 1.16E-04 | 0.60  | Up   |
| ENSG00000106631 | <i>MYL7</i>        | Yes | No  | No  | 1.17E-04 | -1.23 | Down |
| ENSG00000139329 | <i>LUM</i>         | No  | Yes | Yes | 1.17E-04 | 1.26  | Up   |

|                 |                   |     |     |     |          |       |      |
|-----------------|-------------------|-----|-----|-----|----------|-------|------|
| ENSG00000080709 | <i>KCNN2</i>      | Yes | No  | Yes | 1.19E-04 | -1.44 | Down |
| ENSG00000159403 | <i>C1R</i>        | Yes | No  | No  | 1.19E-04 | -1.02 | Down |
| ENSG00000065518 | <i>NDUFB4</i>     | Yes | No  | No  | 1.21E-04 | -0.80 | Down |
| ENSG00000209082 | <i>MT-TL1</i>     | Yes | No  | No  | 1.23E-04 | -1.05 | Down |
| ENSG00000167680 | <i>SEMA6B</i>     | Yes | No  | No  | 1.24E-04 | -1.39 | Down |
| ENSG00000014216 | <i>CAPN1</i>      | Yes | No  | No  | 1.25E-04 | -0.47 | Down |
| ENSG00000159189 | <i>C1QC</i>       | Yes | No  | No  | 1.29E-04 | -1.15 | Down |
| ENSG00000186714 | <i>CCDC73</i>     | Yes | No  | No  | 1.31E-04 | -0.44 | Down |
| ENSG00000101144 | <i>BMP7</i>       | Yes | No  | No  | 1.36E-04 | -1.81 | Down |
| ENSG00000036257 | <i>CUL3</i>       | Yes | No  | No  | 1.38E-04 | -0.66 | Down |
| ENSG00000143870 | <i>PDIA6</i>      | Yes | No  | No  | 1.38E-04 | -0.61 | Down |
| ENSG00000249825 | <i>AC012636.1</i> | Yes | No  | No  | 1.45E-04 | 0.99  | Up   |
| ENSG00000187147 | <i>RNF220</i>     | Yes | No  | No  | 1.52E-04 | -0.48 | Down |
| ENSG00000285577 | <i>AC019127.1</i> | Yes | No  | No  | 1.54E-04 | 0.76  | Up   |
| ENSG00000116260 | <i>QSOX1</i>      | Yes | No  | No  | 1.61E-04 | -1.20 | Down |
| ENSG00000134765 | <i>DSC1</i>       | No  | Yes | No  | 1.68E-04 | 1.51  | Up   |
| ENSG00000178764 | <i>ZHX2</i>       | Yes | No  | No  | 1.74E-04 | -0.60 | Down |
| ENSG00000198034 | <i>RPS4X</i>      | Yes | No  | No  | 1.75E-04 | -0.62 | Down |
| ENSG00000132475 | <i>H3F3B</i>      | Yes | No  | No  | 1.79E-04 | -0.49 | Down |
| ENSG00000141965 | <i>FEM1A</i>      | Yes | No  | No  | 1.84E-04 | -0.77 | Down |
| ENSG00000233138 | <i>AL023584.1</i> | Yes | No  | No  | 1.85E-04 | 0.74  | Up   |
| ENSG00000138326 | <i>RPS24</i>      | Yes | No  | No  | 1.85E-04 | -0.72 | Down |
| ENSG00000165124 | <i>SVEP1</i>      | Yes | No  | Yes | 1.88E-04 | 0.99  | Up   |
| ENSG00000112306 | <i>RPS12</i>      | Yes | No  | No  | 1.91E-04 | -0.79 | Down |
| ENSG00000160447 | <i>PKN3</i>       | Yes | No  | No  | 1.93E-04 | -0.87 | Down |
| ENSG00000101347 | <i>SAMHD1</i>     | Yes | No  | No  | 1.94E-04 | -1.04 | Down |
| ENSG00000277801 | <i>AL138478.1</i> | Yes | No  | No  | 1.96E-04 | -0.32 | Down |
| ENSG00000054654 | <i>SYNE2</i>      | Yes | No  | No  | 1.98E-04 | -0.71 | Down |
| ENSG00000166123 | <i>GPT2</i>       | No  | No  | Yes | 2.01E-04 | -1.21 | Down |
| ENSG00000114554 | <i>PLXNA1</i>     | Yes | No  | No  | 2.12E-04 | -1.03 | Down |
| ENSG00000142330 | <i>CAPN10</i>     | Yes | No  | No  | 2.13E-04 | -0.68 | Down |
| ENSG00000167995 | <i>BEST1</i>      | Yes | No  | No  | 2.21E-04 | -0.46 | Down |
| ENSG00000103056 | <i>SMPD3</i>      | Yes | No  | No  | 2.24E-04 | 0.41  | Up   |
| ENSG00000225098 | <i>BCRP1</i>      | Yes | No  | No  | 2.26E-04 | -1.71 | Down |
| ENSG00000204673 | <i>AKT1S1</i>     | Yes | No  | No  | 2.26E-04 | -0.40 | Down |
| ENSG00000135423 | <i>GLS2</i>       | Yes | No  | No  | 2.26E-04 | 0.56  | Up   |
| ENSG00000113456 | <i>RAD1</i>       | Yes | No  | No  | 2.26E-04 | -0.64 | Down |
| ENSG00000113721 | <i>PDGFRB</i>     | Yes | No  | No  | 2.26E-04 | -0.97 | Down |
| ENSG00000286077 | <i>AL158141.1</i> | Yes | No  | No  | 2.28E-04 | -0.65 | Down |
| ENSG00000106336 | <i>FBXO24</i>     | Yes | No  | No  | 2.34E-04 | 1.11  | Up   |

|                 |                   |     |     |     |          |       |      |
|-----------------|-------------------|-----|-----|-----|----------|-------|------|
| ENSG00000226009 | <i>KCNIP2-AS1</i> | Yes | No  | No  | 2.34E-04 | -1.03 | Down |
| ENSG00000244945 | <i>AC136604.2</i> | Yes | No  | No  | 2.36E-04 | -0.32 | Down |
| ENSG00000149428 | <i>HYOU1</i>      | Yes | No  | No  | 2.42E-04 | -0.87 | Down |
| ENSG00000092969 | <i>TGFB2</i>      | Yes | No  | No  | 2.51E-04 | 1.13  | Up   |
| ENSG00000264578 | <i>AC009630.3</i> | Yes | No  | No  | 2.65E-04 | -0.27 | Down |
| ENSG00000254473 | <i>AL354920.1</i> | Yes | No  | No  | 2.65E-04 | 0.56  | Up   |
| ENSG00000270112 | <i>AC090241.2</i> | Yes | No  | No  | 2.71E-04 | 0.88  | Up   |
| ENSG00000127616 | <i>SMARCA4</i>    | Yes | No  | No  | 2.75E-04 | -0.51 | Down |
| ENSG00000011295 | <i>TTC19</i>      | Yes | No  | No  | 2.77E-04 | -0.32 | Down |
| ENSG00000214783 | <i>POLR2J4</i>    | Yes | No  | No  | 2.80E-04 | -0.41 | Down |
| ENSG00000159251 | <i>ACTC1</i>      | Yes | No  | Yes | 2.85E-04 | -0.75 | Down |
| ENSG00000105618 | <i>PRPF31</i>     | Yes | No  | No  | 3.06E-04 | -0.38 | Down |
| ENSG00000267470 | <i>ZNF571-AS1</i> | Yes | No  | No  | 3.19E-04 | 0.91  | Up   |
| ENSG00000143740 | <i>SNAP47</i>     | Yes | No  | No  | 3.24E-04 | 0.45  | Up   |
| ENSG00000197756 | <i>RPL37A</i>     | Yes | No  | No  | 3.29E-04 | -0.59 | Down |
| ENSG00000234617 | <i>SNRK-AS1</i>   | Yes | No  | No  | 3.49E-04 | 0.72  | Up   |
| ENSG00000088992 | <i>TESC</i>       | No  | No  | Yes | 3.50E-04 | -0.66 | Down |
| ENSG00000007516 | <i>BAIAP3</i>     | Yes | No  | No  | 3.52E-04 | -0.41 | Down |
| ENSG00000225670 | <i>CADM3-AS1</i>  | Yes | No  | Yes | 3.52E-04 | -1.09 | Down |
| ENSG00000279159 | <i>AC003681.1</i> | Yes | No  | No  | 3.54E-04 | 0.31  | Up   |
| ENSG00000264112 | <i>AC015813.1</i> | Yes | No  | No  | 3.55E-04 | 1.13  | Up   |
| ENSG00000226143 | <i>Z98752.1</i>   | Yes | No  | No  | 3.60E-04 | 0.62  | Up   |
| ENSG00000163359 | <i>COL6A3</i>     | Yes | No  | No  | 3.76E-04 | -0.82 | Down |
| ENSG00000064601 | <i>CTSA</i>       | Yes | No  | No  | 3.88E-04 | -0.41 | Down |
| ENSG00000227199 | <i>ST7-AS1</i>    | Yes | No  | No  | 3.90E-04 | -0.54 | Down |
| ENSG00000116871 | <i>MAP7D1</i>     | Yes | No  | No  | 3.95E-04 | -0.44 | Down |
| ENSG00000272750 | <i>AL592148.3</i> | Yes | No  | No  | 3.96E-04 | -0.16 | Down |
| ENSG00000117394 | <i>SLC2A1</i>     | Yes | No  | No  | 4.07E-04 | -0.78 | Down |
| ENSG00000076344 | <i>RGS11</i>      | Yes | No  | No  | 4.21E-04 | 0.83  | Up   |
| ENSG00000008311 | <i>AASS</i>       | Yes | No  | No  | 4.27E-04 | -0.92 | Down |
| ENSG00000261065 | <i>AL592146.1</i> | Yes | No  | No  | 4.41E-04 | -0.79 | Down |
| ENSG00000103415 | <i>HMOX2</i>      | Yes | No  | No  | 4.46E-04 | -0.61 | Down |
| ENSG00000168268 | <i>NT5DC2</i>     | No  | No  | Yes | 4.70E-04 | -1.08 | Down |
| ENSG00000108592 | <i>FTSJ3</i>      | Yes | No  | No  | 4.74E-04 | -0.34 | Down |
| ENSG00000177600 | <i>RPLP2</i>      | Yes | No  | No  | 5.08E-04 | -0.75 | Down |
| ENSG00000102466 | <i>FGF14</i>      | Yes | No  | No  | 5.27E-04 | 1.24  | Up   |
| ENSG00000106484 | <i>MEST</i>       | Yes | No  | No  | 5.37E-04 | 0.80  | Up   |
| ENSG00000018280 | <i>SLC11A1</i>    | No  | Yes | No  | 5.53E-04 | -1.31 | Down |
| ENSG00000132589 | <i>FLOT2</i>      | Yes | No  | No  | 5.55E-04 | -0.94 | Down |
| ENSG00000175463 | <i>TBC1D10C</i>   | Yes | No  | No  | 5.55E-04 | 0.93  | Up   |



|                 |                   |     |     |     |          |       |      |
|-----------------|-------------------|-----|-----|-----|----------|-------|------|
| ENSG00000179604 | <i>CDC42EP4</i>   | Yes | No  | No  | 5.58E-04 | -1.11 | Down |
| ENSG00000271976 | <i>AC012467.2</i> | Yes | No  | No  | 5.64E-04 | -0.94 | Down |
| ENSG00000090061 | <i>CCNK</i>       | Yes | No  | No  | 5.78E-04 | -0.28 | Down |
| ENSG00000140199 | <i>SLC12A6</i>    | Yes | No  | No  | 5.90E-04 | -0.23 | Down |
| ENSG00000187187 | <i>ZNF546</i>     | Yes | No  | No  | 5.91E-04 | 0.56  | Up   |
| ENSG00000135974 | <i>C2orf49</i>    | Yes | No  | No  | 6.00E-04 | 0.85  | Up   |
| ENSG00000104904 | <i>OAZ1</i>       | Yes | No  | No  | 6.11E-04 | -0.77 | Down |
| ENSG00000129116 | <i>PALLD</i>      | Yes | No  | No  | 6.23E-04 | -0.57 | Down |
| ENSG00000148229 | <i>POLE3</i>      | Yes | No  | No  | 6.27E-04 | -0.66 | Down |
| ENSG00000134871 | <i>COL4A2</i>     | Yes | No  | No  | 6.49E-04 | -0.58 | Down |
| ENSG00000135720 | <i>DYNC1LI2</i>   | Yes | No  | No  | 6.69E-04 | 0.75  | Up   |
| ENSG00000129255 | <i>MPDU1</i>      | Yes | No  | No  | 6.71E-04 | -0.37 | Down |
| ENSG00000116962 | <i>NID1</i>       | Yes | Yes | No  | 6.94E-04 | -0.98 | Down |
| ENSG00000134030 | <i>CTIF</i>       | Yes | No  | No  | 7.14E-04 | -0.53 | Down |
| ENSG00000173641 | <i>HSPB7</i>      | Yes | No  | No  | 7.23E-04 | -0.57 | Down |
| ENSG00000273151 | <i>AC073957.3</i> | Yes | No  | No  | 7.40E-04 | 0.54  | Up   |
| ENSG00000267128 | <i>RNF157-AS1</i> | Yes | No  | No  | 7.48E-04 | -0.94 | Down |
| ENSG00000159335 | <i>PTMS</i>       | Yes | No  | No  | 7.88E-04 | -0.76 | Down |
| ENSG00000155115 | <i>GTF3C6</i>     | Yes | No  | No  | 7.89E-04 | -0.70 | Down |
| ENSG00000100968 | <i>NFATC4</i>     | Yes | Yes | No  | 7.93E-04 | -1.20 | Down |
| ENSG00000163082 | <i>SGPP2</i>      | No  | Yes | No  | 8.02E-04 | -1.46 | Down |
| ENSG00000128591 | <i>FLNC</i>       | Yes | No  | No  | 8.13E-04 | -0.88 | Down |
| ENSG00000140564 | <i>FURIN</i>      | Yes | No  | No  | 8.14E-04 | -0.81 | Down |
| ENSG00000143321 | <i>HDGF</i>       | Yes | No  | No  | 8.22E-04 | -0.54 | Down |
| ENSG00000142459 | <i>EVI5L</i>      | Yes | No  | No  | 8.43E-04 | -0.90 | Down |
| ENSG00000110697 | <i>PITPNM1</i>    | Yes | No  | No  | 8.50E-04 | -0.70 | Down |
| ENSG00000132716 | <i>DCAF8</i>      | Yes | No  | No  | 8.57E-04 | 0.44  | Up   |
| ENSG00000229780 | <i>UBE2Q1-AS1</i> | Yes | No  | No  | 8.71E-04 | -0.48 | Down |
| ENSG00000118292 | <i>C1orf54</i>    | Yes | No  | No  | 8.74E-04 | 0.34  | Up   |
| ENSG00000145494 | <i>NDUFS6</i>     | Yes | No  | No  | 8.78E-04 | -0.82 | Down |
| ENSG00000230927 | <i>TMBIM7P</i>    | Yes | No  | No  | 8.87E-04 | 0.65  | Up   |
| ENSG00000132507 | <i>EIF5A</i>      | Yes | No  | No  | 9.14E-04 | -0.48 | Down |
| ENSG00000261684 | <i>AC018362.1</i> | Yes | No  | No  | 9.26E-04 | 0.25  | Up   |
| ENSG00000166831 | <i>RBPMS2</i>     | Yes | No  | No  | 9.33E-04 | -0.89 | Down |
| ENSG00000237686 | <i>AL109615.3</i> | Yes | No  | No  | 9.52E-04 | 0.80  | Up   |
| ENSG00000115593 | <i>SMYD1</i>      | Yes | No  | No  | 9.53E-04 | -0.85 | Down |
| ENSG00000185739 | <i>SRL</i>        | Yes | No  | No  | 1.06E-03 | -0.60 | Down |
| ENSG00000113758 | <i>DBN1</i>       | No  | No  | Yes | 1.08E-03 | -0.87 | Down |
| ENSG00000164879 | <i>CA3</i>        | No  | No  | Yes | 1.09E-03 | 1.42  | Up   |
| ENSG00000181577 | <i>C6orf223</i>   | Yes | No  | No  | 1.10E-03 | 1.10  | Up   |

|                 |                   |     |     |     |          |       |      |
|-----------------|-------------------|-----|-----|-----|----------|-------|------|
| ENSG00000136942 | <i>RPL35</i>      | Yes | No  | No  | 1.10E-03 | -0.58 | Down |
| ENSG00000142910 | <i>TINAGL1</i>    | Yes | No  | No  | 1.10E-03 | -0.66 | Down |
| ENSG00000006007 | <i>GDE1</i>       | Yes | No  | No  | 1.11E-03 | -0.74 | Down |
| ENSG00000163638 | <i>ADAMTS9</i>    | No  | No  | Yes | 1.14E-03 | -1.20 | Down |
| ENSG00000179262 | <i>RAD23A</i>     | Yes | No  | No  | 1.14E-03 | -0.43 | Down |
| ENSG00000173372 | <i>C1QA</i>       | Yes | No  | No  | 1.21E-03 | -0.99 | Down |
| ENSG00000186350 | <i>RXRA</i>       | Yes | No  | No  | 1.21E-03 | -0.68 | Down |
| ENSG00000065882 | <i>TBC1D1</i>     | Yes | No  | No  | 1.23E-03 | -0.83 | Down |
| ENSG00000121440 | <i>PDZRN3</i>     | Yes | No  | No  | 1.23E-03 | -0.45 | Down |
| ENSG00000272540 | <i>AL662797.1</i> | Yes | No  | No  | 1.25E-03 | -0.58 | Down |
| ENSG00000196437 | <i>ZNF569</i>     | Yes | No  | No  | 1.27E-03 | 0.66  | Up   |
| ENSG00000107263 | <i>RAPGEF1</i>    | Yes | No  | No  | 1.28E-03 | -0.66 | Down |
| ENSG00000185222 | <i>TCEAL9</i>     | Yes | No  | No  | 1.32E-03 | -0.52 | Down |
| ENSG00000151729 | <i>SLC25A4</i>    | Yes | No  | No  | 1.40E-03 | -0.54 | Down |
| ENSG00000158859 | <i>ADAMTS4</i>    | No  | No  | No  | 1.44E-03 | -1.15 | Down |
| ENSG00000185896 | <i>LAMP1</i>      | Yes | No  | No  | 1.44E-03 | -0.64 | Down |
| ENSG00000261276 | <i>AP003071.3</i> | Yes | No  | No  | 1.47E-03 | -1.06 | Down |
| ENSG00000238045 | <i>AC009133.1</i> | Yes | No  | No  | 1.48E-03 | -0.45 | Down |
| ENSG00000188677 | <i>PARVB</i>      | Yes | No  | No  | 1.49E-03 | -0.81 | Down |
| ENSG00000237732 | <i>AC010980.1</i> | Yes | No  | No  | 1.50E-03 | -1.20 | Down |
| ENSG00000131653 | <i>TRAF7</i>      | Yes | No  | No  | 1.50E-03 | -0.62 | Down |
| ENSG00000168140 | <i>VASN</i>       | Yes | Yes | No  | 1.51E-03 | -0.89 | Down |
| ENSG00000115705 | <i>TPO</i>        | No  | Yes | No  | 1.52E-03 | -1.15 | Down |
| ENSG00000188467 | <i>SLC24A5</i>    | Yes | No  | No  | 1.53E-03 | 0.48  | Up   |
| ENSG00000130508 | <i>PXDN</i>       | Yes | No  | No  | 1.53E-03 | -1.11 | Down |
| ENSG00000069122 | <i>ADGRF5</i>     | Yes | No  | No  | 1.55E-03 | -0.60 | Down |
| ENSG00000239857 | <i>GET4</i>       | Yes | No  | No  | 1.56E-03 | 0.73  | Up   |
| ENSG00000168256 | <i>NKIRAS2</i>    | Yes | No  | No  | 1.56E-03 | -0.37 | Down |
| ENSG00000135519 | <i>KCNH3</i>      | Yes | No  | No  | 1.57E-03 | -0.63 | Down |
| ENSG00000124562 | <i>SNRPC</i>      | Yes | No  | No  | 1.59E-03 | -0.82 | Down |
| ENSG00000196182 | <i>STK40</i>      | Yes | No  | No  | 1.62E-03 | -0.71 | Down |
| ENSG00000131652 | <i>THOC6</i>      | Yes | No  | No  | 1.62E-03 | -0.58 | Down |
| ENSG00000282917 | <i>AC107068.2</i> | No  | No  | Yes | 1.63E-03 | -1.40 | Down |
| ENSG00000179632 | <i>MAF1</i>       | Yes | No  | No  | 1.66E-03 | -0.47 | Down |
| ENSG00000165655 | <i>ZNF503</i>     | Yes | No  | No  | 1.68E-03 | -0.99 | Down |
| ENSG00000102225 | <i>CDK16</i>      | Yes | No  | No  | 1.73E-03 | -0.70 | Down |
| ENSG00000106483 | <i>SFRP4</i>      | Yes | Yes | No  | 1.78E-03 | 1.52  | Up   |
| ENSG00000104907 | <i>TRMT1</i>      | Yes | No  | No  | 1.83E-03 | -0.71 | Down |
| ENSG00000231437 | <i>LINC01750</i>  | Yes | No  | No  | 1.83E-03 | -0.89 | Down |
| ENSG00000153902 | <i>LGI4</i>       | Yes | No  | No  | 1.84E-03 | -0.76 | Down |

|                 |                    |     |     |     |          |       |      |
|-----------------|--------------------|-----|-----|-----|----------|-------|------|
| ENSG00000232907 | <i>DLGAP4-AS1</i>  | Yes | No  | No  | 1.87E-03 | 0.29  | Up   |
| ENSG0000022840  | <i>RNF10</i>       | Yes | No  | No  | 1.90E-03 | -0.51 | Down |
| ENSG0000064300  | <i>NGFR</i>        | No  | Yes | No  | 1.90E-03 | -1.28 | Down |
| ENSG00000179636 | <i>TPPP2</i>       | Yes | No  | No  | 1.91E-03 | -0.50 | Down |
| ENSG00000198892 | <i>SHISA4</i>      | Yes | No  | No  | 1.91E-03 | -1.07 | Down |
| ENSG00000143545 | <i>RAB13</i>       | Yes | No  | No  | 1.93E-03 | -0.67 | Down |
| ENSG00000132000 | <i>PODNL1</i>      | Yes | No  | No  | 1.94E-03 | 1.41  | Up   |
| ENSG00000138031 | <i>ADCY3</i>       | Yes | No  | No  | 2.03E-03 | -0.77 | Down |
| ENSG00000184009 | <i>ACTG1</i>       | Yes | No  | No  | 2.07E-03 | -0.73 | Down |
| ENSG00000140443 | <i>IGF1R</i>       | Yes | No  | No  | 2.07E-03 | 0.62  | Up   |
| ENSG00000250159 | <i>AC106791.1</i>  | Yes | No  | No  | 2.07E-03 | -0.79 | Down |
| ENSG00000115241 | <i>PPM1G</i>       | Yes | No  | No  | 2.09E-03 | -0.57 | Down |
| ENSG00000269881 | <i>AC004754.1</i>  | Yes | No  | No  | 2.10E-03 | 0.58  | Up   |
| ENSG00000164733 | <i>CTSB</i>        | Yes | No  | No  | 2.10E-03 | -0.50 | Down |
| ENSG00000171476 | <i>HOPX</i>        | No  | No  | Yes | 2.13E-03 | -1.47 | Down |
| ENSG00000141568 | <i>FOXK2</i>       | Yes | No  | No  | 2.13E-03 | -0.35 | Down |
| ENSG00000126934 | <i>MAP2K2</i>      | Yes | No  | No  | 2.13E-03 | -0.83 | Down |
| ENSG00000259352 | <i>AC091117.1</i>  | Yes | No  | No  | 2.24E-03 | -0.48 | Down |
| ENSG00000259031 | <i>AL845552.2</i>  | Yes | No  | No  | 2.25E-03 | 1.36  | Up   |
| ENSG00000197912 | <i>SPG7</i>        | Yes | No  | No  | 2.39E-03 | -0.44 | Down |
| ENSG00000162706 | <i>CADM3</i>       | No  | No  | Yes | 2.41E-03 | -1.26 | Down |
| ENSG00000110400 | <i>NECTIN1</i>     | Yes | Yes | No  | 2.60E-03 | -1.03 | Down |
| ENSG00000156453 | <i>PCDH1</i>       | Yes | No  | No  | 2.64E-03 | -0.97 | Down |
| ENSG00000173114 | <i>LRRN3</i>       | No  | No  | Yes | 2.65E-03 | -1.57 | Down |
| ENSG00000267255 | <i>AC011498.3</i>  | Yes | No  | No  | 2.65E-03 | -0.84 | Down |
| ENSG00000198522 | <i>GPN1</i>        | Yes | No  | No  | 2.67E-03 | -0.19 | Down |
| ENSG00000161647 | <i>MPP3</i>        | Yes | No  | No  | 2.68E-03 | -1.09 | Down |
| ENSG00000241158 | <i>ADAMTS9-AS1</i> | Yes | No  | Yes | 2.72E-03 | -1.15 | Down |
| ENSG00000233223 | <i>AC016876.1</i>  | Yes | No  | No  | 2.72E-03 | -0.61 | Down |
| ENSG00000149657 | <i>LSM14B</i>      | Yes | No  | No  | 2.76E-03 | -0.64 | Down |
| ENSG00000117281 | <i>CD160</i>       | Yes | No  | No  | 2.86E-03 | 0.45  | Up   |
| ENSG00000010327 | <i>STAB1</i>       | No  | Yes | No  | 2.88E-03 | -0.62 | Down |
| ENSG00000156885 | <i>COX6A2</i>      | Yes | No  | No  | 2.97E-03 | -0.59 | Down |
| ENSG00000224597 | <i>SVIL-AS1</i>    | Yes | No  | No  | 3.03E-03 | 0.31  | Up   |
| ENSG00000180354 | <i>MTURN</i>       | No  | No  | Yes | 3.03E-03 | 0.96  | Up   |
| ENSG00000140987 | <i>ZSCAN32</i>     | Yes | No  | No  | 3.04E-03 | 0.30  | Up   |
| ENSG00000175832 | <i>ETV4</i>        | No  | No  | Yes | 3.06E-03 | 1.28  | Up   |
| ENSG00000142494 | <i>SLC47A1</i>     | Yes | No  | No  | 3.07E-03 | 1.04  | Up   |
| ENSG00000113504 | <i>SLC12A7</i>     | Yes | No  | No  | 3.08E-03 | -0.39 | Down |
| ENSG00000100243 | <i>CYB5R3</i>      | Yes | No  | No  | 3.16E-03 | -0.56 | Down |

|                 |                   |     |    |     |          |       |      |
|-----------------|-------------------|-----|----|-----|----------|-------|------|
| ENSG00000171853 | <i>TRAPPC12</i>   | Yes | No | No  | 3.19E-03 | -0.50 | Down |
| ENSG00000158315 | <i>RHBDL2</i>     | Yes | No | No  | 3.23E-03 | 0.79  | Up   |
| ENSG00000166313 | <i>APBB1</i>      | Yes | No | No  | 3.23E-03 | -0.63 | Down |
| ENSG00000088256 | <i>GNA11</i>      | Yes | No | No  | 3.23E-03 | -0.57 | Down |
| ENSG00000011347 | <i>SYT7</i>       | Yes | No | No  | 3.30E-03 | -0.96 | Down |
| ENSG00000165175 | <i>MID1IP1</i>    | Yes | No | No  | 3.47E-03 | -1.00 | Down |
| ENSG00000265287 | <i>AC005726.5</i> | Yes | No | No  | 3.55E-03 | 0.51  | Up   |
| ENSG00000168309 | <i>FAM107A</i>    | Yes | No | No  | 3.55E-03 | -0.97 | Down |
| ENSG00000117395 | <i>EBNA1BP2</i>   | Yes | No | No  | 3.57E-03 | -0.78 | Down |
| ENSG00000078098 | <i>FAP</i>        | No  | No | Yes | 3.57E-03 | 1.05  | Up   |
| ENSG00000011304 | <i>PTBP1</i>      | Yes | No | No  | 3.59E-03 | -0.93 | Down |
| ENSG00000078808 | <i>SDF4</i>       | Yes | No | No  | 3.61E-03 | -0.54 | Down |
| ENSG00000249669 | <i>CARMN</i>      | No  | No | Yes | 3.61E-03 | -0.82 | Down |
| ENSG00000174903 | <i>RAB1B</i>      | Yes | No | No  | 3.64E-03 | -0.67 | Down |
| ENSG00000185624 | <i>P4HB</i>       | Yes | No | No  | 3.65E-03 | -0.52 | Down |
| ENSG00000187189 | <i>TSPYL4</i>     | Yes | No | No  | 3.72E-03 | -0.58 | Down |
| ENSG00000128272 | <i>ATF4</i>       | Yes | No | No  | 3.74E-03 | -0.77 | Down |
| ENSG00000205189 | <i>ZBTB10</i>     | Yes | No | No  | 3.74E-03 | 0.50  | Up   |
| ENSG00000129351 | <i>ILF3</i>       | Yes | No | No  | 3.77E-03 | -0.46 | Down |
| ENSG00000023902 | <i>PLEKHO1</i>    | Yes | No | No  | 3.80E-03 | -0.90 | Down |
| ENSG00000100106 | <i>TRIOBP</i>     | Yes | No | No  | 3.83E-03 | -0.51 | Down |
| ENSG00000109107 | <i>ALDOC</i>      | Yes | No | No  | 3.84E-03 | -0.82 | Down |
| ENSG00000123144 | <i>TRIR</i>       | Yes | No | No  | 3.84E-03 | -0.56 | Down |
| ENSG00000258260 | <i>AC073896.5</i> | Yes | No | No  | 3.97E-03 | -0.42 | Down |
| ENSG00000100296 | <i>THOC5</i>      | Yes | No | No  | 3.98E-03 | -0.87 | Down |
| ENSG00000162817 | <i>C1orf115</i>   | Yes | No | No  | 3.98E-03 | -1.03 | Down |
| ENSG00000165672 | <i>PRDX3</i>      | Yes | No | No  | 3.99E-03 | -0.74 | Down |
| ENSG00000249087 | <i>ZNF436-AS1</i> | No  | No | Yes | 4.01E-03 | 0.90  | Up   |
| ENSG00000136848 | <i>DAB2IP</i>     | Yes | No | No  | 4.06E-03 | -0.55 | Down |
| ENSG00000097046 | <i>CDC7</i>       | Yes | No | No  | 4.10E-03 | -1.29 | Down |
| ENSG00000124795 | <i>DEK</i>        | Yes | No | No  | 4.17E-03 | -0.56 | Down |
| ENSG00000174038 | <i>C9orf131</i>   | Yes | No | No  | 4.17E-03 | 0.72  | Up   |
| ENSG00000166106 | <i>ADAMTS15</i>   | No  | No | Yes | 4.17E-03 | -0.90 | Down |
| ENSG00000274211 | <i>SOCS7</i>      | Yes | No | No  | 4.18E-03 | 0.81  | Up   |
| ENSG00000122176 | <i>FMOD</i>       | No  | No | Yes | 4.27E-03 | 1.12  | Up   |
| ENSG00000064225 | <i>ST3GAL6</i>    | Yes | No | No  | 4.32E-03 | 0.50  | Up   |
| ENSG00000151883 | <i>PARP8</i>      | Yes | No | No  | 4.38E-03 | 0.70  | Up   |
| ENSG00000113916 | <i>BCL6</i>       | Yes | No | No  | 4.48E-03 | -0.85 | Down |
| ENSG00000140553 | <i>UNC45A</i>     | Yes | No | No  | 4.49E-03 | -0.21 | Down |
| ENSG00000210100 | <i>MT-TI</i>      | Yes | No | No  | 4.68E-03 | -0.66 | Down |

|                 |                   |     |     |     |          |       |      |
|-----------------|-------------------|-----|-----|-----|----------|-------|------|
| ENSG00000091527 | <i>CDV3</i>       | Yes | No  | No  | 4.71E-03 | -0.44 | Down |
| ENSG00000275457 | <i>AL117332.1</i> | Yes | No  | No  | 4.88E-03 | -0.36 | Down |
| ENSG00000148484 | <i>RSU1</i>       | Yes | No  | No  | 5.03E-03 | -0.79 | Down |
| ENSG00000034533 | <i>ASTE1</i>      | Yes | No  | No  | 5.04E-03 | 0.18  | Up   |
| ENSG00000230532 | <i>AC091133.1</i> | Yes | No  | No  | 5.30E-03 | -0.36 | Down |
| ENSG00000142227 | <i>EMP3</i>       | Yes | No  | No  | 5.45E-03 | -0.85 | Down |
| ENSG00000127585 | <i>FBXL16</i>     | No  | No  | Yes | 5.48E-03 | 1.60  | Up   |
| ENSG00000152082 | <i>MZT2B</i>      | Yes | No  | No  | 5.54E-03 | -0.52 | Down |
| ENSG00000122033 | <i>MTIF3</i>      | Yes | No  | No  | 5.57E-03 | -0.42 | Down |
| ENSG00000174640 | <i>SLCO2A1</i>    | No  | Yes | No  | 5.60E-03 | -1.06 | Down |
| ENSG00000197043 | <i>ANXA6</i>      | Yes | No  | No  | 5.62E-03 | -0.62 | Down |
| ENSG00000146147 | <i>MLIP</i>       | Yes | No  | No  | 5.73E-03 | -0.72 | Down |
| ENSG00000165487 | <i>MICU2</i>      | Yes | No  | No  | 5.78E-03 | -0.88 | Down |
| ENSG00000090013 | <i>BLVRB</i>      | Yes | No  | No  | 5.86E-03 | -0.83 | Down |
| ENSG00000079999 | <i>KEAP1</i>      | Yes | No  | No  | 5.88E-03 | -0.76 | Down |
| ENSG00000257225 | <i>AC079601.1</i> | Yes | No  | Yes | 5.99E-03 | 0.71  | Up   |
| ENSG00000182481 | <i>KPNA2</i>      | Yes | No  | No  | 6.01E-03 | -1.01 | Down |
| ENSG00000268442 | <i>AC073534.1</i> | Yes | No  | No  | 6.01E-03 | 1.00  | Up   |
| ENSG00000124380 | <i>SNRNP27</i>    | Yes | No  | No  | 6.02E-03 | -0.72 | Down |
| ENSG00000167723 | <i>TRPV3</i>      | No  | No  | Yes | 6.02E-03 | 1.28  | Up   |
| ENSG00000228113 | <i>AC003991.1</i> | Yes | No  | No  | 6.02E-03 | -0.61 | Down |
| ENSG00000137959 | <i>IFI44L</i>     | No  | No  | Yes | 6.03E-03 | 1.14  | Up   |
| ENSG00000067829 | <i>IDH3G</i>      | Yes | No  | No  | 6.05E-03 | -0.49 | Down |
| ENSG00000068001 | <i>HYAL2</i>      | Yes | No  | No  | 6.14E-03 | -1.08 | Down |
| ENSG00000232973 | <i>CYP1B1-AS1</i> | Yes | No  | No  | 6.14E-03 | 0.90  | Up   |
| ENSG00000168079 | <i>SCARA5</i>     | Yes | No  | No  | 6.26E-03 | -1.15 | Down |
| ENSG00000175183 | <i>CSRP2</i>      | No  | No  | Yes | 6.26E-03 | -0.92 | Down |
| ENSG00000210117 | <i>MT-TW</i>      | Yes | No  | No  | 6.26E-03 | -0.98 | Down |
| ENSG00000022267 | <i>FHL1</i>       | Yes | No  | No  | 6.29E-03 | -0.67 | Down |
| ENSG00000160685 | <i>ZBTB7B</i>     | Yes | No  | No  | 6.40E-03 | -0.79 | Down |
| ENSG00000185201 | <i>IFITM2</i>     | No  | No  | No  | 6.57E-03 | -1.03 | Down |
| ENSG00000122378 | <i>PRXL2A</i>     | Yes | No  | No  | 6.59E-03 | -0.75 | Down |
| ENSG00000222019 | <i>URAHP</i>      | Yes | No  | No  | 6.68E-03 | 0.31  | Up   |
| ENSG00000109339 | <i>MAPK10</i>     | Yes | No  | No  | 6.68E-03 | 0.34  | Up   |
| ENSG00000164236 | <i>ANKRD33B</i>   | No  | Yes | No  | 6.69E-03 | 0.97  | Up   |
| ENSG00000134046 | <i>MBD2</i>       | Yes | No  | No  | 6.78E-03 | -0.80 | Down |
| ENSG00000278367 | <i>AL356652.1</i> | Yes | No  | No  | 6.98E-03 | -0.77 | Down |
| ENSG00000011243 | <i>AKAP8L</i>     | Yes | No  | No  | 7.18E-03 | -0.45 | Down |
| ENSG00000166794 | <i>PPIB</i>       | Yes | No  | No  | 7.26E-03 | -0.68 | Down |
| ENSG00000257553 | <i>AC034102.4</i> | Yes | No  | No  | 7.28E-03 | -0.31 | Down |

|                 |                   |     |     |    |          |       |      |
|-----------------|-------------------|-----|-----|----|----------|-------|------|
| ENSG00000157653 | <i>C9orf43</i>    | Yes | No  | No | 7.33E-03 | -0.42 | Down |
| ENSG00000166676 | <i>TVP23A</i>     | Yes | No  | No | 7.37E-03 | -0.22 | Down |
| ENSG00000138080 | <i>EMILIN1</i>    | Yes | No  | No | 7.47E-03 | -0.74 | Down |
| ENSG00000099875 | <i>MKNK2</i>      | Yes | No  | No | 7.57E-03 | -0.76 | Down |
| ENSG00000278616 | <i>BEND3P3</i>    | Yes | No  | No | 7.59E-03 | 0.90  | Up   |
| ENSG00000164897 | <i>TMUB1</i>      | Yes | No  | No | 7.72E-03 | -0.69 | Down |
| ENSG00000173264 | <i>GPR137</i>     | Yes | No  | No | 7.79E-03 | -0.35 | Down |
| ENSG00000204463 | <i>BAG6</i>       | Yes | No  | No | 7.79E-03 | -0.38 | Down |
| ENSG00000161203 | <i>AP2M1</i>      | Yes | No  | No | 7.91E-03 | -0.48 | Down |
| ENSG00000164253 | <i>WDR41</i>      | Yes | No  | No | 7.91E-03 | 0.57  | Up   |
| ENSG00000100345 | <i>MYH9</i>       | Yes | No  | No | 8.11E-03 | -0.48 | Down |
| ENSG00000162551 | <i>ALPL</i>       | No  | No  | No | 8.13E-03 | -1.28 | Down |
| ENSG00000075413 | <i>MARK3</i>      | Yes | No  | No | 8.31E-03 | -0.72 | Down |
| ENSG00000213889 | <i>PPM1N</i>      | Yes | No  | No | 8.34E-03 | -0.43 | Down |
| ENSG00000130725 | <i>UBE2M</i>      | Yes | No  | No | 8.34E-03 | -0.53 | Down |
| ENSG00000110925 | <i>CSRNP2</i>     | Yes | No  | No | 8.36E-03 | 0.33  | Up   |
| ENSG00000255422 | <i>AP002954.1</i> | Yes | No  | No | 8.46E-03 | 0.59  | Up   |
| ENSG00000171552 | <i>BCL2L1</i>     | Yes | No  | No | 8.54E-03 | -0.90 | Down |
| ENSG00000116176 | <i>TPSG1</i>      | No  | Yes | No | 8.58E-03 | -2.22 | Down |
| ENSG00000179564 | <i>LSMEM2</i>     | Yes | No  | No | 8.66E-03 | -0.37 | Down |
| ENSG00000197586 | <i>ENTPD6</i>     | Yes | No  | No | 8.81E-03 | -0.66 | Down |
| ENSG00000151365 | <i>THRSP</i>      | No  | No  | No | 8.81E-03 | 1.71  | Up   |
| ENSG00000142733 | <i>MAP3K6</i>     | No  | No  | No | 8.95E-03 | -0.91 | Down |
| ENSG00000274386 | <i>TMEM269</i>    | Yes | No  | No | 9.18E-03 | -0.50 | Down |
| ENSG00000166173 | <i>LARP6</i>      | Yes | No  | No | 9.45E-03 | -0.69 | Down |
| ENSG00000064666 | <i>CNN2</i>       | Yes | No  | No | 9.51E-03 | -0.92 | Down |
| ENSG00000141198 | <i>TOM1L1</i>     | Yes | No  | No | 9.52E-03 | 0.31  | Up   |
| ENSG00000140941 | <i>MAP1LC3B</i>   | Yes | No  | No | 9.54E-03 | -0.36 | Down |
| ENSG00000101224 | <i>CDC25B</i>     | No  | Yes | No | 9.58E-03 | -0.87 | Down |
| ENSG00000155090 | <i>KLF10</i>      | Yes | No  | No | 9.58E-03 | -1.19 | Down |
| ENSG00000128309 | <i>MPST</i>       | Yes | No  | No | 9.75E-03 | -0.94 | Down |
| ENSG00000205726 | <i>ITSN1</i>      | Yes | No  | No | 9.78E-03 | -0.35 | Down |
| ENSG00000267064 | <i>UXT-AS1</i>    | Yes | No  | No | 9.91E-03 | -0.38 | Down |
| ENSG00000119979 | <i>FAM45A</i>     | Yes | No  | No | 1.00E-02 | 0.47  | Up   |
| ENSG00000187840 | <i>EIF4EBP1</i>   | Yes | No  | No | 1.00E-02 | -1.16 | Down |
| ENSG00000162878 | <i>PKDCC</i>      | Yes | No  | No | 1.03E-02 | -0.78 | Down |
| ENSG00000123143 | <i>PKN1</i>       | Yes | No  | No | 1.03E-02 | -0.70 | Down |
| ENSG00000158246 | <i>TENT5B</i>     | No  | No  | No | 1.03E-02 | -1.35 | Down |
| ENSG00000170734 | <i>POLH</i>       | Yes | No  | No | 1.06E-02 | 0.70  | Up   |
| ENSG00000185033 | <i>SEMA4B</i>     | No  | Yes | No | 1.06E-02 | -0.88 | Down |

|                 |                   |     |     |     |          |       |      |
|-----------------|-------------------|-----|-----|-----|----------|-------|------|
| ENSG00000115484 | <i>CCT4</i>       | Yes | No  | No  | 1.06E-02 | -0.61 | Down |
| ENSG00000072274 | <i>TFRC</i>       | Yes | No  | No  | 1.07E-02 | -0.99 | Down |
| ENSG00000145476 | <i>CYP4V2</i>     | Yes | No  | No  | 1.08E-02 | 1.11  | Up   |
| ENSG00000135424 | <i>ITGA7</i>      | Yes | No  | No  | 1.08E-02 | -0.34 | Down |
| ENSG00000105894 | <i>PTN</i>        | No  | Yes | No  | 1.09E-02 | 0.84  | Up   |
| ENSG00000170889 | <i>RPS9</i>       | Yes | No  | No  | 1.09E-02 | -0.54 | Down |
| ENSG00000235902 | <i>AC108472.1</i> | No  | No  | Yes | 1.09E-02 | 1.19  | Up   |
| ENSG00000102103 | <i>PQBP1</i>      | Yes | No  | No  | 1.09E-02 | -0.44 | Down |
| ENSG00000160886 | <i>LY6K</i>       | Yes | No  | No  | 1.12E-02 | 1.57  | Up   |
| ENSG00000106290 | <i>TAF6</i>       | Yes | No  | No  | 1.13E-02 | -0.23 | Down |
| ENSG00000108679 | <i>LGALS3BP</i>   | Yes | No  | No  | 1.13E-02 | -0.72 | Down |
| ENSG00000170584 | <i>NUDCD2</i>     | Yes | No  | No  | 1.13E-02 | -0.41 | Down |
| ENSG00000172059 | <i>KLF11</i>      | Yes | No  | No  | 1.13E-02 | 0.57  | Up   |
| ENSG00000135049 | <i>AGTPBP1</i>    | Yes | No  | No  | 1.14E-02 | -0.98 | Down |
| ENSG00000153823 | <i>PID1</i>       | Yes | No  | No  | 1.14E-02 | -1.18 | Down |
| ENSG00000186184 | <i>POLR1D</i>     | Yes | No  | No  | 1.15E-02 | -0.56 | Down |
| ENSG00000113296 | <i>THBS4</i>      | Yes | No  | No  | 1.18E-02 | 0.79  | Up   |
| ENSG00000169564 | <i>PCBP1</i>      | Yes | No  | No  | 1.19E-02 | -0.50 | Down |
| ENSG00000183067 | <i>IGSF5</i>      | Yes | No  | No  | 1.20E-02 | -0.96 | Down |
| ENSG00000160539 | <i>PLPP7</i>      | Yes | No  | No  | 1.21E-02 | -0.60 | Down |
| ENSG00000087274 | <i>ADD1</i>       | Yes | No  | No  | 1.21E-02 | -0.49 | Down |
| ENSG00000154928 | <i>EPHB1</i>      | Yes | No  | No  | 1.22E-02 | -0.89 | Down |
| ENSG00000104812 | <i>GYS1</i>       | Yes | No  | No  | 1.24E-02 | -0.48 | Down |
| ENSG00000185483 | <i>ROR1</i>       | No  | No  | Yes | 1.24E-02 | 0.85  | Up   |
| ENSG00000177706 | <i>FAM20C</i>     | Yes | No  | No  | 1.29E-02 | -0.95 | Down |
| ENSG00000234638 | <i>AC053503.4</i> | Yes | No  | No  | 1.30E-02 | -0.36 | Down |
| ENSG00000198355 | <i>PIM3</i>       | Yes | No  | No  | 1.30E-02 | -0.88 | Down |
| ENSG00000231500 | <i>RPS18</i>      | Yes | No  | No  | 1.33E-02 | -0.39 | Down |
| ENSG00000100234 | <i>TIMP3</i>      | No  | Yes | No  | 1.33E-02 | -0.62 | Down |
| ENSG00000234745 | <i>HLA-B</i>      | Yes | No  | No  | 1.36E-02 | -0.48 | Down |
| ENSG00000136770 | <i>DNAJC1</i>     | Yes | No  | No  | 1.37E-02 | -0.81 | Down |
| ENSG00000185924 | <i>RTN4RL1</i>    | No  | No  | Yes | 1.37E-02 | -1.17 | Down |
| ENSG00000142748 | <i>FCN3</i>       | No  | No  | Yes | 1.38E-02 | -1.57 | Down |
| ENSG00000043591 | <i>ADRB1</i>      | Yes | No  | No  | 1.38E-02 | -0.90 | Down |
| ENSG00000087495 | <i>PHACTR3</i>    | No  | No  | No  | 1.38E-02 | -1.57 | Down |
| ENSG00000273212 | <i>AC000068.2</i> | Yes | No  | No  | 1.39E-02 | -0.40 | Down |
| ENSG00000231389 | <i>HLA-DPA1</i>   | No  | No  | Yes | 1.40E-02 | 0.58  | Up   |
| ENSG00000178105 | <i>DDX10</i>      | Yes | No  | No  | 1.40E-02 | -0.83 | Down |
| ENSG00000063046 | <i>EIF4B</i>      | Yes | No  | No  | 1.41E-02 | 0.41  | Up   |
| ENSG00000255468 | <i>AP001107.9</i> | Yes | No  | No  | 1.43E-02 | -0.41 | Down |

|                 |                   |     |    |     |          |       |      |
|-----------------|-------------------|-----|----|-----|----------|-------|------|
| ENSG00000114353 | <i>GNAI2</i>      | Yes | No | No  | 1.43E-02 | -0.50 | Down |
| ENSG00000163866 | <i>SMIM12</i>     | Yes | No | No  | 1.45E-02 | -0.59 | Down |
| ENSG00000072756 | <i>TRNT1</i>      | Yes | No | No  | 1.47E-02 | 0.23  | Up   |
| ENSG00000241111 | <i>AC092040.1</i> | Yes | No | No  | 1.47E-02 | 0.96  | Up   |
| ENSG00000168487 | <i>BMP1</i>       | Yes | No | No  | 1.47E-02 | -1.04 | Down |
| ENSG00000102710 | <i>SUPT20H</i>    | Yes | No | No  | 1.48E-02 | 0.32  | Up   |
| ENSG00000074219 | <i>TEAD2</i>      | Yes | No | No  | 1.50E-02 | -0.85 | Down |
| ENSG00000254614 | <i>AP003068.2</i> | Yes | No | No  | 1.50E-02 | -0.58 | Down |
| ENSG00000248668 | <i>OXCT1-AS1</i>  | Yes | No | No  | 1.52E-02 | 0.54  | Up   |
| ENSG00000225602 | <i>MTOR-AS1</i>   | Yes | No | No  | 1.53E-02 | -0.27 | Down |
| ENSG00000174059 | <i>CD34</i>       | Yes | No | No  | 1.53E-02 | -0.69 | Down |
| ENSG00000132205 | <i>EMILIN2</i>    | No  | No | No  | 1.53E-02 | -0.95 | Down |
| ENSG00000250565 | <i>ATP6V1E2</i>   | Yes | No | No  | 1.54E-02 | 0.64  | Up   |
| ENSG00000196230 | <i>TUBB</i>       | Yes | No | No  | 1.54E-02 | -0.59 | Down |
| ENSG00000180900 | <i>SCRIB</i>      | Yes | No | No  | 1.54E-02 | -0.57 | Down |
| ENSG00000150995 | <i>ITPR1</i>      | Yes | No | No  | 1.55E-02 | 0.54  | Up   |
| ENSG00000151640 | <i>DPYSL4</i>     | Yes | No | No  | 1.58E-02 | -0.80 | Down |
| ENSG00000125753 | <i>VASP</i>       | Yes | No | No  | 1.61E-02 | -0.65 | Down |
| ENSG00000269934 | <i>AL353593.2</i> | Yes | No | No  | 1.61E-02 | 0.37  | Up   |
| ENSG00000113749 | <i>HRH2</i>       | No  | No | Yes | 1.62E-02 | -0.74 | Down |
| ENSG00000163346 | <i>PBXIP1</i>     | Yes | No | No  | 1.62E-02 | -0.45 | Down |
| ENSG00000280239 | <i>AC011498.7</i> | Yes | No | No  | 1.64E-02 | 0.24  | Up   |
| ENSG00000103316 | <i>CRYM</i>       | No  | No | No  | 1.65E-02 | 0.88  | Up   |
| ENSG00000224934 | <i>AL391684.1</i> | No  | No | No  | 1.65E-02 | 0.73  | Up   |
| ENSG00000154133 | <i>ROBO4</i>      | Yes | No | No  | 1.65E-02 | -0.83 | Down |
| ENSG00000237781 | <i>AL356356.1</i> | No  | No | Yes | 1.68E-02 | -0.81 | Down |
| ENSG00000198542 | <i>ITGBL1</i>     | No  | No | No  | 1.68E-02 | 1.02  | Up   |
| ENSG00000065717 | <i>TLE2</i>       | Yes | No | No  | 1.72E-02 | -1.17 | Down |
| ENSG00000214193 | <i>SH3D21</i>     | Yes | No | No  | 1.72E-02 | 0.43  | Up   |
| ENSG00000197766 | <i>CFD</i>        | Yes | No | No  | 1.72E-02 | -0.67 | Down |
| ENSG00000210195 | <i>MT-TT</i>      | Yes | No | No  | 1.72E-02 | -1.18 | Down |
| ENSG00000254027 | <i>AC009902.2</i> | Yes | No | No  | 1.72E-02 | -0.52 | Down |
| ENSG00000174429 | <i>ABRA</i>       | No  | No | No  | 1.72E-02 | -1.02 | Down |
| ENSG00000001167 | <i>NFYA</i>       | Yes | No | No  | 1.73E-02 | 1.12  | Up   |
| ENSG00000138495 | <i>COX17</i>      | Yes | No | No  | 1.74E-02 | -0.60 | Down |
| ENSG00000172935 | <i>MRGPRF</i>     | No  | No | No  | 1.76E-02 | -0.98 | Down |
| ENSG00000161011 | <i>SQSTM1</i>     | Yes | No | No  | 1.79E-02 | 0.26  | Up   |
| ENSG00000080824 | <i>HSP90AA1</i>   | Yes | No | No  | 1.81E-02 | -0.55 | Down |
| ENSG00000072952 | <i>MRVI1</i>      | No  | No | Yes | 1.82E-02 | -0.77 | Down |
| ENSG00000134460 | <i>IL2RA</i>      | No  | No | Yes | 1.82E-02 | -1.48 | Down |



|                 |                    |     |     |     |          |       |      |
|-----------------|--------------------|-----|-----|-----|----------|-------|------|
| ENSG00000138587 | <i>MNS1</i>        | Yes | No  | No  | 1.85E-02 | 1.38  | Up   |
| ENSG00000166816 | <i>LDHD</i>        | Yes | No  | No  | 1.87E-02 | -0.63 | Down |
| ENSG00000104825 | <i>NFKB1B</i>      | Yes | No  | No  | 1.88E-02 | -0.76 | Down |
| ENSG00000109062 | <i>SLC9A3R1</i>    | Yes | No  | No  | 1.88E-02 | -0.87 | Down |
| ENSG00000185818 | <i>NAT8L</i>       | No  | Yes | No  | 1.89E-02 | 1.16  | Up   |
| ENSG00000136717 | <i>BIN1</i>        | Yes | No  | No  | 1.89E-02 | -0.83 | Down |
| ENSG00000162191 | <i>UBXN1</i>       | Yes | No  | No  | 1.89E-02 | -0.55 | Down |
| ENSG00000138459 | <i>SLC35A5</i>     | Yes | No  | No  | 1.89E-02 | 0.35  | Up   |
| ENSG00000134851 | <i>TMEM165</i>     | Yes | No  | No  | 1.92E-02 | -0.53 | Down |
| ENSG00000182162 | <i>P2RY8</i>       | Yes | No  | No  | 1.99E-02 | 1.07  | Up   |
| ENSG00000234438 | <i>KBTBD13</i>     | No  | No  | Yes | 2.00E-02 | -0.93 | Down |
| ENSG00000245322 | <i>AC097460.1</i>  | Yes | No  | No  | 2.00E-02 | -0.43 | Down |
| ENSG00000258092 | <i>AC005841.1</i>  | Yes | No  | No  | 2.01E-02 | -0.47 | Down |
| ENSG00000196154 | <i>S100A4</i>      | No  | No  | No  | 2.03E-02 | -1.09 | Down |
| ENSG00000172795 | <i>DCP2</i>        | Yes | No  | No  | 2.04E-02 | 0.83  | Up   |
| ENSG00000271806 | <i>AL590822.2</i>  | Yes | No  | No  | 2.06E-02 | -0.58 | Down |
| ENSG00000131386 | <i>GALNT15</i>     | No  | No  | No  | 2.08E-02 | -1.16 | Down |
| ENSG00000255750 | <i>AC022509.1</i>  | No  | No  | No  | 2.12E-02 | 1.14  | Up   |
| ENSG00000119917 | <i>IFIT3</i>       | Yes | No  | No  | 2.14E-02 | 0.92  | Up   |
| ENSG00000160075 | <i>SSU72</i>       | Yes | No  | No  | 2.21E-02 | -0.64 | Down |
| ENSG00000066422 | <i>ZBTB11</i>      | Yes | No  | No  | 2.24E-02 | 0.40  | Up   |
| ENSG00000084636 | <i>COL16A1</i>     | Yes | No  | No  | 2.25E-02 | 0.64  | Up   |
| ENSG00000141101 | <i>NOB1</i>        | Yes | No  | No  | 2.25E-02 | -0.65 | Down |
| ENSG00000159166 | <i>LAD1</i>        | Yes | No  | No  | 2.36E-02 | -1.60 | Down |
| ENSG00000285938 | <i>AC072022.2</i>  | Yes | No  | No  | 2.36E-02 | -0.94 | Down |
| ENSG00000235448 | <i>LURAP1L-AS1</i> | Yes | No  | No  | 2.40E-02 | 0.38  | Up   |
| ENSG00000139278 | <i>GLIPR1</i>      | Yes | No  | No  | 2.41E-02 | -0.17 | Down |
| ENSG00000285966 | <i>AC007686.4</i>  | No  | No  | Yes | 2.42E-02 | -1.74 | Down |
| ENSG00000198517 | <i>MAFK</i>        | No  | No  | No  | 2.48E-02 | 0.68  | Up   |
| ENSG00000250303 | <i>AP002884.1</i>  | No  | No  | Yes | 2.49E-02 | -0.95 | Down |
| ENSG00000136279 | <i>DBNL</i>        | Yes | No  | No  | 2.50E-02 | -0.47 | Down |
| ENSG00000143537 | <i>ADAM15</i>      | No  | No  | No  | 2.51E-02 | -0.77 | Down |
| ENSG00000134470 | <i>IL15RA</i>      | No  | No  | No  | 2.52E-02 | -0.92 | Down |
| ENSG00000167984 | <i>NLRC3</i>       | Yes | No  | No  | 2.52E-02 | 0.41  | Up   |
| ENSG00000138079 | <i>SLC3A1</i>      | Yes | No  | No  | 2.56E-02 | 0.43  | Up   |
| ENSG00000130382 | <i>MLLT1</i>       | Yes | No  | No  | 2.57E-02 | -0.64 | Down |
| ENSG00000184371 | <i>CSF1</i>        | Yes | No  | No  | 2.57E-02 | -0.97 | Down |
| ENSG00000136068 | <i>FLNB</i>        | Yes | No  | No  | 2.61E-02 | -0.52 | Down |
| ENSG00000121039 | <i>RDH10</i>       | No  | No  | Yes | 2.62E-02 | -0.90 | Down |
| ENSG00000286186 | <i>AC018445.5</i>  | Yes | No  | No  | 2.63E-02 | 0.45  | Up   |

|                 |                   |     |    |     |          |       |      |
|-----------------|-------------------|-----|----|-----|----------|-------|------|
| ENSG00000162889 | <i>MAPKAPK2</i>   | Yes | No | No  | 2.64E-02 | -0.35 | Down |
| ENSG00000187185 | <i>AC092118.1</i> | Yes | No | No  | 2.64E-02 | 0.58  | Up   |
| ENSG00000198176 | <i>TFDP1</i>      | Yes | No | No  | 2.65E-02 | -0.91 | Down |
| ENSG00000181104 | <i>F2R</i>        | No  | No | Yes | 2.68E-02 | 0.95  | Up   |
| ENSG00000136448 | <i>NMT1</i>       | Yes | No | No  | 2.74E-02 | -0.33 | Down |
| ENSG00000002586 | <i>CD99</i>       | Yes | No | No  | 2.75E-02 | -0.61 | Down |
| ENSG00000170458 | <i>CD14</i>       | No  | No | No  | 2.75E-02 | -0.88 | Down |
| ENSG00000114120 | <i>SLC25A36</i>   | Yes | No | No  | 2.79E-02 | 0.65  | Up   |
| ENSG00000184949 | <i>FAM227A</i>    | Yes | No | No  | 2.79E-02 | 1.13  | Up   |
| ENSG00000124507 | <i>PACSN1</i>     | No  | No | Yes | 2.79E-02 | -0.88 | Down |
| ENSG00000119718 | <i>EIF2B2</i>     | Yes | No | No  | 2.80E-02 | -0.34 | Down |
| ENSG00000116786 | <i>PLEKHM2</i>    | Yes | No | No  | 2.81E-02 | -0.58 | Down |
| ENSG00000124702 | <i>KLHDC3</i>     | Yes | No | No  | 2.81E-02 | -0.81 | Down |
| ENSG00000188846 | <i>RPL14</i>      | Yes | No | No  | 2.81E-02 | -0.45 | Down |
| ENSG00000176463 | <i>SLCO3A1</i>    | Yes | No | No  | 2.85E-02 | -0.56 | Down |
| ENSG00000065621 | <i>GSTO2</i>      | Yes | No | No  | 2.88E-02 | 1.00  | Up   |
| ENSG00000260630 | <i>SNAI3-AS1</i>  | Yes | No | No  | 2.89E-02 | -0.97 | Down |
| ENSG00000137161 | <i>CNPY3</i>      | Yes | No | No  | 2.92E-02 | -0.49 | Down |
| ENSG00000182177 | <i>ASB18</i>      | No  | No | Yes | 2.95E-02 | 0.92  | Up   |
| ENSG00000211455 | <i>STK38L</i>     | Yes | No | No  | 2.95E-02 | 0.90  | Up   |
| ENSG00000204219 | <i>TCEA3</i>      | Yes | No | No  | 2.98E-02 | -0.54 | Down |
| ENSG00000140395 | <i>WDR61</i>      | Yes | No | No  | 3.01E-02 | 0.43  | Up   |
| ENSG00000137198 | <i>GMPR</i>       | Yes | No | No  | 3.06E-02 | -0.75 | Down |
| ENSG00000175130 | <i>MARCKSL1</i>   | Yes | No | No  | 3.11E-02 | -0.93 | Down |
| ENSG00000133275 | <i>CSNK1G2</i>    | Yes | No | No  | 3.22E-02 | -0.62 | Down |
| ENSG00000173156 | <i>RHOD</i>       | Yes | No | No  | 3.24E-02 | -1.06 | Down |
| ENSG00000179743 | <i>AL450998.2</i> | Yes | No | No  | 3.25E-02 | -0.64 | Down |
| ENSG00000232295 | <i>AL589935.1</i> | Yes | No | No  | 3.26E-02 | 0.63  | Up   |
| ENSG00000242396 | <i>AC096536.2</i> | No  | No | No  | 3.26E-02 | -1.14 | Down |
| ENSG00000099917 | <i>MED15</i>      | Yes | No | No  | 3.29E-02 | -0.61 | Down |
| ENSG00000101210 | <i>EEF1A2</i>     | Yes | No | No  | 3.31E-02 | -0.41 | Down |
| ENSG00000068831 | <i>RASGRP2</i>    | Yes | No | No  | 3.35E-02 | -0.96 | Down |
| ENSG00000099785 | <i>MARCH2</i>     | Yes | No | No  | 3.36E-02 | -0.69 | Down |
| ENSG00000092010 | <i>PSME1</i>      | Yes | No | No  | 3.37E-02 | -0.57 | Down |
| ENSG00000203883 | <i>SOX18</i>      | No  | No | No  | 3.39E-02 | -0.74 | Down |
| ENSG00000137168 | <i>PPIL1</i>      | No  | No | Yes | 3.44E-02 | -0.54 | Down |
| ENSG00000132481 | <i>AC087289.1</i> | No  | No | No  | 3.44E-02 | -0.74 | Down |
| ENSG00000203865 | <i>ATP1A1-AS1</i> | Yes | No | No  | 3.44E-02 | -0.47 | Down |
| ENSG00000130921 | <i>C12orf65</i>   | Yes | No | No  | 3.49E-02 | -0.37 | Down |
| ENSG00000183023 | <i>SLC8A1</i>     | Yes | No | No  | 3.54E-02 | 0.68  | Up   |

|                 |                   |     |    |    |          |       |      |
|-----------------|-------------------|-----|----|----|----------|-------|------|
| ENSG00000104805 | <i>NUCB1</i>      | Yes | No | No | 3.54E-02 | -0.44 | Down |
| ENSG00000100564 | <i>PIGH</i>       | Yes | No | No | 3.54E-02 | -0.48 | Down |
| ENSG00000280064 | <i>AC130304.1</i> | Yes | No | No | 3.54E-02 | 0.76  | Up   |
| ENSG00000124251 | <i>TP53TG5</i>    | Yes | No | No | 3.54E-02 | -0.49 | Down |
| ENSG00000162458 | <i>FBLIM1</i>     | No  | No | No | 3.54E-02 | -0.78 | Down |
| ENSG00000166441 | <i>RPL27A</i>     | Yes | No | No | 3.55E-02 | -0.23 | Down |
| ENSG00000196470 | <i>SIAH1</i>      | Yes | No | No | 3.59E-02 | 0.26  | Up   |
| ENSG00000204628 | <i>RACK1</i>      | Yes | No | No | 3.60E-02 | -0.31 | Down |
| ENSG00000170515 | <i>PA2G4</i>      | Yes | No | No | 3.60E-02 | -0.55 | Down |
| ENSG00000106809 | <i>OGN</i>        | No  | No | No | 3.61E-02 | 1.18  | Up   |
| ENSG00000130726 | <i>TRIM28</i>     | Yes | No | No | 3.68E-02 | -0.69 | Down |
| ENSG00000268756 | <i>AC104534.1</i> | Yes | No | No | 3.73E-02 | 0.78  | Up   |
| ENSG00000167994 | <i>RAB3IL1</i>    | Yes | No | No | 3.76E-02 | -0.96 | Down |
| ENSG00000196923 | <i>PDLIM7</i>     | No  | No | No | 3.76E-02 | -0.98 | Down |
| ENSG00000064726 | <i>BTBD1</i>      | Yes | No | No | 3.78E-02 | 0.43  | Up   |
| ENSG00000131469 | <i>RPL27</i>      | Yes | No | No | 3.79E-02 | -0.66 | Down |
| ENSG00000108774 | <i>RAB5C</i>      | Yes | No | No | 3.80E-02 | -0.78 | Down |
| ENSG00000127774 | <i>EMC6</i>       | Yes | No | No | 3.83E-02 | -0.60 | Down |
| ENSG00000132359 | <i>RAP1GAP2</i>   | Yes | No | No | 3.83E-02 | -0.77 | Down |
| ENSG00000267801 | <i>AC087289.6</i> | Yes | No | No | 3.90E-02 | -0.70 | Down |
| ENSG00000116106 | <i>EPHA4</i>      | Yes | No | No | 3.92E-02 | 0.66  | Up   |
| ENSG00000167797 | <i>CDK2AP2</i>    | No  | No | No | 3.94E-02 | -0.81 | Down |
| ENSG00000125656 | <i>CLPP</i>       | Yes | No | No | 3.94E-02 | -0.91 | Down |
| ENSG00000221968 | <i>FADS3</i>      | Yes | No | No | 3.94E-02 | -0.61 | Down |
| ENSG00000027697 | <i>IFNGR1</i>     | Yes | No | No | 3.96E-02 | -0.38 | Down |
| ENSG00000245330 | <i>AP005717.1</i> | Yes | No | No | 3.98E-02 | -0.41 | Down |
| ENSG00000279086 | <i>AC073130.3</i> | Yes | No | No | 3.98E-02 | -0.62 | Down |
| ENSG00000160801 | <i>PTH1R</i>      | No  | No | No | 4.02E-02 | -0.87 | Down |
| ENSG00000147155 | <i>EBP</i>        | No  | No | No | 4.05E-02 | -1.18 | Down |
| ENSG00000160789 | <i>LMNA</i>       | Yes | No | No | 4.06E-02 | -0.47 | Down |
| ENSG00000139567 | <i>ACVRL1</i>     | Yes | No | No | 4.08E-02 | -0.73 | Down |
| ENSG00000186814 | <i>ZSCAN30</i>    | Yes | No | No | 4.12E-02 | 0.45  | Up   |
| ENSG00000101342 | <i>TLDC2</i>      | Yes | No | No | 4.13E-02 | -0.69 | Down |
| ENSG00000177679 | <i>SRRM3</i>      | No  | No | No | 4.18E-02 | -1.07 | Down |
| ENSG00000106823 | <i>ECM2</i>       | No  | No | No | 4.22E-02 | 1.00  | Up   |
| ENSG00000149596 | <i>JPH2</i>       | Yes | No | No | 4.24E-02 | -0.51 | Down |
| ENSG00000177156 | <i>TALDO1</i>     | Yes | No | No | 4.27E-02 | -0.60 | Down |
| ENSG00000269982 | <i>AC018809.2</i> | Yes | No | No | 4.32E-02 | -0.19 | Down |
| ENSG00000070540 | <i>WIPI1</i>      | Yes | No | No | 4.32E-02 | 0.37  | Up   |
| ENSG00000173272 | <i>MZT2A</i>      | No  | No | No | 4.33E-02 | -0.66 | Down |

|                 |                   |     |    |     |          |       |      |
|-----------------|-------------------|-----|----|-----|----------|-------|------|
| ENSG00000227051 | <i>C14orf132</i>  | No  | No | Yes | 4.34E-02 | 0.91  | Up   |
| ENSG00000140988 | <i>RPS2</i>       | Yes | No | No  | 4.35E-02 | -0.71 | Down |
| ENSG00000187051 | <i>RPS19BP1</i>   | Yes | No | No  | 4.39E-02 | -0.56 | Down |
| ENSG00000063177 | <i>RPL18</i>      | Yes | No | No  | 4.40E-02 | -0.51 | Down |
| ENSG00000106819 | <i>ASPN</i>       | No  | No | No  | 4.40E-02 | 1.27  | Up   |
| ENSG00000159884 | <i>CCDC107</i>    | Yes | No | No  | 4.40E-02 | -0.61 | Down |
| ENSG00000135624 | <i>CCT7</i>       | Yes | No | No  | 4.42E-02 | -0.53 | Down |
| ENSG00000101400 | <i>SNTA1</i>      | Yes | No | No  | 4.44E-02 | -0.57 | Down |
| ENSG00000110987 | <i>BCL7A</i>      | Yes | No | No  | 4.50E-02 | 0.44  | Up   |
| ENSG00000141404 | <i>GNAL</i>       | Yes | No | No  | 4.51E-02 | 0.11  | Up   |
| ENSG00000182718 | <i>ANXA2</i>      | Yes | No | No  | 4.55E-02 | -0.96 | Down |
| ENSG00000108518 | <i>PFN1</i>       | Yes | No | No  | 4.58E-02 | -0.54 | Down |
| ENSG00000235505 | <i>CASP17P</i>    | Yes | No | No  | 4.58E-02 | 1.23  | Up   |
| ENSG00000116717 | <i>GADD45A</i>    | Yes | No | No  | 4.63E-02 | 0.71  | Up   |
| ENSG00000165886 | <i>UBTD1</i>      | Yes | No | No  | 4.66E-02 | -0.87 | Down |
| ENSG00000100523 | <i>DDHD1</i>      | Yes | No | No  | 4.67E-02 | 0.70  | Up   |
| ENSG00000130309 | <i>COLGALT1</i>   | Yes | No | No  | 4.71E-02 | -0.82 | Down |
| ENSG00000180999 | <i>C1orf105</i>   | No  | No | No  | 4.76E-02 | -1.41 | Down |
| ENSG00000198663 | <i>C6orf89</i>    | Yes | No | No  | 4.77E-02 | -0.37 | Down |
| ENSG00000148175 | <i>STOM</i>       | Yes | No | No  | 4.79E-02 | -0.56 | Down |
| ENSG00000170935 | <i>NCBP2L</i>     | Yes | No | No  | 4.81E-02 | 0.61  | Up   |
| ENSG00000149554 | <i>CHEK1</i>      | Yes | No | No  | 4.82E-02 | 0.62  | Up   |
| ENSG00000172348 | <i>RCAN2</i>      | Yes | No | No  | 4.84E-02 | -0.47 | Down |
| ENSG00000175287 | <i>PHYHD1</i>     | No  | No | No  | 4.85E-02 | -0.87 | Down |
| ENSG00000279296 | <i>PRAL</i>       | No  | No | No  | 4.88E-02 | 0.50  | Up   |
| ENSG00000170801 | <i>HTRA3</i>      | Yes | No | No  | 4.89E-02 | -0.55 | Down |
| ENSG00000138622 | <i>HCN4</i>       | Yes | No | No  | 4.90E-02 | -1.16 | Down |
| ENSG00000187955 | <i>COL14A1</i>    | No  | No | No  | 4.90E-02 | 0.93  | Up   |
| ENSG00000055070 | <i>SZRD1</i>      | Yes | No | No  | 4.91E-02 | -0.43 | Down |
| ENSG00000134684 | <i>YARS</i>       | No  | No | No  | 4.91E-02 | -0.68 | Down |
| ENSG00000132938 | <i>MTUS2</i>      | Yes | No | No  | 4.91E-02 | -0.58 | Down |
| ENSG00000248636 | <i>AC002070.1</i> | Yes | No | No  | 4.93E-02 | 0.73  | Up   |
| ENSG00000228804 | <i>AC072022.1</i> | No  | No | No  | 4.96E-02 | -0.71 | Down |
| ENSG00000087074 | <i>PPP1R15A</i>   | Yes | No | No  | 4.97E-02 | 0.57  | Up   |
| ENSG00000137492 | <i>THAP12</i>     | Yes | No | No  | 4.97E-02 | 0.98  | Up   |
| ENSG00000186185 | <i>KIF18B</i>     | Yes | No | No  | 4.99E-02 | -2.00 | Down |

1: Indicates if the gene was differentially expressed in each individual study; 2: FDR-adjusted p-value from meta-analysis, "E" represents "times ten raised to the power of"; 3: Average of log<sub>2</sub>FC from individual studies; 4: 'Up' or 'Down' indicates if the gene was upregulated or downregulated. The genes were sorted based on the adjusted p-values.

**Supplementary Table S2. Differentially expressed upstream regulators and their target genes.**

| Upstream Regulator | Log <sub>2</sub> FC | Molecule Type           | Activation z-score <sup>1</sup> | p-value of overlap <sup>2</sup> | Target Molecules in Dataset                                                                                                                                                                                                                                                                                                                        |
|--------------------|---------------------|-------------------------|---------------------------------|---------------------------------|----------------------------------------------------------------------------------------------------------------------------------------------------------------------------------------------------------------------------------------------------------------------------------------------------------------------------------------------------|
| <i>SMARCA4</i>     | -0.51               | transcription regulator | -3.00                           | 3.51E-07                        | <i>ACTA2, ADAM15, BIN1, C1orf105, C1orf54, CKM, CSF1, CSNK1G2, CTSB, DES, ECM2, EMP3, EPHA4, FADS3, FBLIM1, FLNB, GADD45A, GYS1, HLA-B, IER3, IFITM2, IL15RA, ITGA7, ITPR1, LMNA, LUM, MTND2, MYL4, NECTIN1, PCDH1, PLEKHO1, PLIN2, RAD1, RHBDL2, SLC11A1, SMARCA4, STARD10, TGFB2, TNNT2, TPM1, TUBA3C/TUBA3D, TUBB, ZNF503</i>                   |
| <i>ERBB2</i>       | -0.58               | kinase                  | -0.86                           | 3.58E-07                        | <i>ACTA2, ACTB, ALDOC, ANXA2, ATF4, BCL2L1, BMP1, BMP7, CD34, CDC25B, CDC7, CHEK1, COL4A1, COL6A1, COL6A3, CTSB, CUL3, DAG1, DDX10, EBP, EIF4EBP1, EMP3, ERBB2, ETV4, F2R, FLOT2, GPX3, GTF3A, IGF1R, KLHDC3, LAMP1, LUM, MKNK2, MME, MYL9, NID1, PLIN2, POLR1D, PSMC3, RHOD, S100A4, SLC2A1, ST3GAL6, STAT3, TCEAL9, THBS4, TIMP3, TPM1, USF2</i> |
| <i>TFRC</i>        | -0.99               | transporter             | 0.19                            | 5.77E-06                        | <i>ANXA2, ATF4, F13A1, FAM20C, FTH1, GADD45A, GPX3, PPP1R15A, PTN, SLC2A1, TGFB2, UBE2E1</i>                                                                                                                                                                                                                                                       |
| <i>THBS4</i>       | 0.79                | other                   | -1.77                           | 1.74E-04                        | <i>ATF4, CALR, CRELD2, HYOU1, P4HB, TGFB2</i>                                                                                                                                                                                                                                                                                                      |
| <i>IGF1R</i>       | 0.62                | transmembrane receptor  | -2.00                           | 4.86E-04                        | <i>ACTA2, BCL2L1, CD37, COL4A1, COL4A2, COX6A2, DES, FLNC, FTH1, IGF1R, NDUFB4, RPL37A, RPS24, S100A4, SCARA5, STAT3, TFDP1, TIMP3, TPO</i>                                                                                                                                                                                                        |
| <i>PMP22</i>       | -0.86               | other                   |                                 | 7.98E-04                        | <i>EMP3, FLOT1, NGFR, PMP22</i>                                                                                                                                                                                                                                                                                                                    |
| <i>ATF4</i>        | -0.77               | transcription regulator | -1.09                           | 1.03E-03                        | <i>ATF4, CALR, EIF4EBP1, GADD45A, GYS1, HYOU1, MAP1LC3B, MID1IP1, NUPR1, PMP22, PPP1R15A, STAT3, TGFB2</i>                                                                                                                                                                                                                                         |
| <i>ATG7</i>        | 0.26                | enzyme                  | 0.32                            | 1.39E-03                        | <i>ACTA2, ATF4, CTSB, LAMP1, MARCO, S100A4, SLC2A1, SQSTM1</i>                                                                                                                                                                                                                                                                                     |
| <i>ACTG1</i>       | -0.73               | other                   |                                 | 1.89E-03                        | <i>ACTA2, ACTB, CNN1</i>                                                                                                                                                                                                                                                                                                                           |
| <i>DAG1</i>        | -0.70               | transmembrane receptor  | -1.00                           | 2.06E-03                        | <i>DAG1, ITGA7, SLC2A1, SNTA1</i>                                                                                                                                                                                                                                                                                                                  |
| <i>PDCD5</i>       | -0.99               | other                   |                                 | 2.57E-03                        | <i>ATP2A2, FOXP3</i>                                                                                                                                                                                                                                                                                                                               |
| <i>PDGFRB</i>      | -0.97               | kinase                  |                                 | 5.90E-03                        | <i>ACTA2, PDGFRB, STAT3</i>                                                                                                                                                                                                                                                                                                                        |
| <i>PFN1</i>        | -0.54               | other                   |                                 | 8.23E-03                        | <i>ANXA2, SQSTM1</i>                                                                                                                                                                                                                                                                                                                               |
| <i>S100A9</i>      | -2.13               | other                   | 0.65                            | 1.20E-02                        | <i>ADAMTS4, ALPL, C1QB, C3, COX6A2, FBLIM1, FURIN, NGFR, PHLDA1, S100A9, SOCS7</i>                                                                                                                                                                                                                                                                 |
| <i>CLPP</i>        | -0.91               | peptidase               | 2.45                            | 1.24E-02                        | <i>IDH2, IDH3G, OGDH, PRDX3, SLC25A4, TALDO1</i>                                                                                                                                                                                                                                                                                                   |

|                 |       |                         |       |          |                                                             |
|-----------------|-------|-------------------------|-------|----------|-------------------------------------------------------------|
| <i>NCAM1</i>    | -0.61 | other                   |       | 1.29E-02 | <i>CALR, NCAM1, NFKB1B</i>                                  |
| <i>NFYA</i>     | 1.12  | transcription regulator |       | 1.46E-02 | <i>CALR, CDC25B, FTH1, GADD45A, PDGFRB, PPP1R15A, THRSP</i> |
| <i>TGFB2</i>    | 1.13  | growth factor           | -0.73 | 1.57E-02 | <i>ACTA2, ASPN, CNN1, DES, FMOD, FURIN, PDGFRB, TGFB2</i>   |
| <i>PTP4A3</i>   | -0.94 | phosphatase             |       | 1.75E-02 | <i>HSP90AA1, IGF1R, PCBP1</i>                               |
| <i>DNMT1</i>    | -0.87 | enzyme                  |       | 1.83E-02 | <i>ACTB, CMTM5, DNMT1, FOXP3, PTN, SFRP4, TIMP3</i>         |
| <i>PPP1R15A</i> | 0.57  | other                   |       | 2.02E-02 | <i>ATF4, GADD45A, MAP1LC3B</i>                              |
| <i>ETV4</i>     | 1.28  | transcription regulator |       | 2.11E-02 | <i>ACTA2, CAV1, ERBB2, ETV4</i>                             |
| <i>EIF4G1</i>   | -0.80 | translation regulator   |       | 2.61E-02 | <i>BCL2L1, CHEK1, GADD45A</i>                               |
| <i>TPO</i>      | -1.15 | enzyme                  |       | 2.96E-02 | <i>FOXP3</i>                                                |
| <i>MPP3</i>     | -1.09 | kinase                  |       | 2.96E-02 | <i>NECTIN1</i>                                              |
| <i>CFD</i>      | -0.68 | peptidase               |       | 2.96E-02 | <i>C3</i>                                                   |
| <i>TNNC1</i>    | -0.57 | other                   |       | 2.96E-02 | <i>SLC8A1</i>                                               |
| <i>JPH2</i>     | -0.51 | enzyme                  |       | 2.96E-02 | <i>SLC8A1</i>                                               |
| <i>EIF2B2</i>   | -0.34 | other                   |       | 2.96E-02 | <i>ACTB</i>                                                 |
| <i>FMOD</i>     | 1.13  | other                   |       | 2.96E-02 | <i>LUM</i>                                                  |
| <i>FTH1</i>     | -0.72 | enzyme                  |       | 3.36E-02 | <i>FTH1, TFRC</i>                                           |
| <i>LY6K</i>     | 1.57  | other                   |       | 3.36E-02 | <i>CD34, LY6K</i>                                           |
| <i>HIST1H1C</i> | -0.80 | other                   |       | 4.03E-02 | <i>ACTB, IER3</i>                                           |
| <i>SGPP2</i>    | -1.46 | phosphatase             |       | 4.04E-02 | <i>ATF4, HSP90AA1, HSPB7</i>                                |
| <i>CTSB</i>     | -0.50 | peptidase               |       | 4.45E-02 | <i>ACTA2, BCL2L1, CTSB</i>                                  |
| <i>MBD2</i>     | -0.80 | transcription regulator | 0.15  | 4.56E-02 | <i>ACTB, ADAM15, FOXP3, NUPR1, RNASE1</i>                   |
| <i>STK40</i>    | -0.71 | kinase                  |       | 4.66E-02 | <i>C1QA, C1QB, CKM, DES</i>                                 |
| <i>TAF6</i>     | -0.23 | transcription regulator |       | 4.88E-02 | <i>GADD45A, SRSF4, UNC45A</i>                               |

1: Positive and negative z-scores are considered as activated and inhibited, respectively; 2: p-value < 0.05 reflects a significant association between the upstream regulator and its targeted genes, "E" represents "times ten raised to the power of". The genes were sorted based on the p-value of overlap.

**Supplementary Table S3. Significant canonical pathways with absolute z-score > 2.0 and the involved genes.**

| <b>Ingenuity Canonical Pathways</b>       | <b>-log(p)<sup>1</sup></b> | <b>z-score<sup>2</sup></b> | <b>genes</b>                                                                                                                                                                                                                    |
|-------------------------------------------|----------------------------|----------------------------|---------------------------------------------------------------------------------------------------------------------------------------------------------------------------------------------------------------------------------|
| EIF2 Signaling                            | 12.4                       | -2.83                      | <i>ACTA2, ACTB, ACTC1, ATF4, EIF2B2, EIF4G1, IGF1R, MAP2K2, PPP1R15A, PTBP1, RPL14, RPL18, RPL23, RPL26, RPL27, RPL27A, RPL35, RPL37A, RPL6, RPL8, RPLP0, RPLP1, RPLP2, RPS12, RPS18, RPS2, RPS24, RPS25, RPS4X, RPS5, RPS9</i> |
| RhoA Signaling                            | 4.27                       | -2.89                      | <i>ACTA2, ACTB, ACTC1, ACTG1, CDC42EP4, IGF1R, MYL3, MYL4, MYL7, MYL9, PFN1, PKN1, PLXNA1</i>                                                                                                                                   |
| Integrin Signaling                        | 3.8                        | -3.15                      | <i>ACTA2, ACTB, ACTC1, ACTG1, CAPN1, CAPN10, CAPNS1, CAV1, ITGA7, MAP2K2, MYL7, MYL9, PARVB, PFN1, RAPGEF1, RHOD, VASP</i>                                                                                                      |
| Actin Cytoskeleton Signaling              | 3.68                       | -3.21                      | <i>ACTA2, ACTB, ACTC1, ACTG1, CD14, F2R, FGF14, FLNA, MAP2K2, MYH6, MYH9, MYL3, MYL4, MYL7, MYL9, PFN1, TMSB10/TMSB4X</i>                                                                                                       |
| Cardiac Hypertrophy Signaling (Enhanced)  | 3.39                       | -2.27                      | <i>ADCY3, ADRB1, ATP2A2, CACNA1D, EIF2B2, EIF4EBP1, FGF14, FICD, GDE1, GNA11, GNAI2, HSPB7, IGF1R, IL15RA, IL2RA, ITPR1, MAP2K2, MAP3K6, MAPK10, MAPKAPK2, MKNK2, NFATC4, NGFR, NKX2-5, PKN1, PLCE1, STAT3, TGFB2</i>           |
| Complement System                         | 3.23                       | -2.45                      | <i>C1QA, C1QB, C1QC, C1R, C3, CFD</i>                                                                                                                                                                                           |
| Signaling by Rho Family GTPases           | 3.16                       | -3.21                      | <i>ACTA2, ACTB, ACTC1, ACTG1, CDC42EP4, DES, GNA11, GNAI2, GNAL, MAP2K2, MAPK10, MYL3, MYL4, MYL7, MYL9, PKN1, RHOD</i>                                                                                                         |
| Regulation of Actin-based Motility by Rho | 2.82                       | -3.00                      | <i>ACTA2, ACTB, ACTC1, MYL3, MYL4, MYL7, MYL9, PFN1, RHOD</i>                                                                                                                                                                   |
| RhoGDI Signaling                          | 2.23                       | 3.00                       | <i>ACTA2, ACTB, ACTC1, ACTG1, GNA11, GNAI2, GNAL, MYL3, MYL4, MYL7, MYL9, RHOD</i>                                                                                                                                              |
| VEGF Signaling                            | 1.6                        | -2.45                      | <i>ACTA2, ACTB, ACTC1, ACTG1, BCL2L1, EIF2B2, MAP2K2</i>                                                                                                                                                                        |
| Ephrin Receptor Signaling                 | 1.45                       | -2.12                      | <i>ATF4, EPHA4, EPHB1, GNA11, GNAI2, GNAL, ITSN1, MAP2K2, RAPGEF1, STAT3</i>                                                                                                                                                    |

1: -log(p) > 1.3 reflects a significant association between the canonical pathway and its involved genes; 2: Positive and negative z-scores are considered as activated and inhibited, respectively. The pathways were sorted based on the -log(p).
